# Supplementary material
Source: PubMed Central journal article supplement (PMC2614692)
Supplement: NIHMS83326-supplement-Supplement.pdf [file NIHMS83326-supplement-Supplement.pdf]

Supplementary Table 1 Odds ratios (OR) adjusted for global ancestry and 95% confidence interval (95% CI) of non-diabetic (Non-DM) and diabetic (DM) ESRD for 14 MYH9 SNPs assuming three genotype-specific risks

| genotype  |    | Non-DM |             |                        |                        |                       | DM   |              |                       |                      |                      |
|-----------|----|--------|-------------|------------------------|------------------------|-----------------------|------|--------------|-----------------------|----------------------|----------------------|
| SNP       |    | OR     | 95% CI      | P value <sup>1</sup>   | P value <sup>2</sup>   | P value <sup>3</sup>  | OR   | 95% CI       | P value <sup>1</sup>  | P value <sup>2</sup> | P value <sup>3</sup> |
| rs7078    | GA | 0.84   | (0.34,2.06) | 0.70                   | 1.24x10 <sup>-6</sup>  | 0.70                  | 0.57 | (0.27,1.19)  | 0.13                  | 0.04                 | 0.13                 |
|           | AA | 1.67   | (0.69,4.01) | 0.25                   |                        |                       | 0.76 | (0.37,1.56)  | 0.45                  |                      |                      |
| rs12107   | AG | 0.38   | (0.12,1.23) | 0.11                   | 3.49x10 <sup>-3</sup>  | 0.10                  | 0.74 | (0.22,2.50)  | 0.63                  | 0.67                 | 0.63                 |
|           | GG | 0.63   | (0.2,1.99)  | 0.43                   |                        |                       | 0.68 | (0.21,2.24)  | 0.53                  |                      |                      |
| rs735853  | GC | 1.07   | (0.36,3.18) | 0.90                   | 3.14x10 <sup>-4</sup>  | 0.90                  | 0.77 | (0.34,1.73)  | 0.52                  | 0.63                 | 0.52                 |
|           | CC | 2.02   | (0.71,5.78) | 0.19                   |                        |                       | 0.71 | (0.32,1.56)  | 0.39                  |                      |                      |
| rs5756129 | CT | 1.34   | (0.64,2.80) | 0.43                   | 2.71x10 <sup>-5</sup>  | 0.42                  | 0.62 | (0.36,1.08)  | 0.09                  | 0.22                 | 0.09                 |
|           | TT | 2.25   | (1.10,4.60) | 0.02                   |                        |                       | 0.70 | (0.41,1.19)  | 0.19                  |                      |                      |
| rs5756130 | TC | 0.92   | (0.29,2.9)  | 0.89                   | 4.64x10 <sup>-3</sup>  | 0.89                  | 0.54 | (0.22,1.37)  | 0.20                  | 0.43                 | 0.19                 |
|           | CC | 1.46   | (0.47,4.49) | 0.51                   |                        |                       | 0.56 | (0.23,1.39)  | 0.21                  |                      |                      |
| rs875725  | TC | 0.35   | (0.03,3.91) | 0.39                   | 0.44                   | 0.37                  | 0.97 | (0.06,15.81) | 0.98                  | 0.84                 | 0.98                 |
|           | TT | 0.42   | (0.04,4.59) | 0.47                   |                        |                       | 0.88 | (0.05,14.16) | 0.93                  |                      |                      |
| rs4821480 | TG | 0.89   | (0.58,1.36) | 0.59                   | 6.85x10 <sup>-11</sup> | 0.60                  | 0.69 | (0.48,1.01)  | 0.05                  | 0.14                 | 0.05                 |
|           | GG | 1.99   | (1.34,2.96) | 7.16x10 <sup>-4</sup>  |                        |                       | 0.72 | (0.50,1.03)  | 0.07                  |                      |                      |
| rs2032487 | TC | 0.95   | (0.63,1.44) | 0.81                   | 1.90x10 <sup>-14</sup> | 0.81                  | 0.63 | (0.45,0.89)  | 0.01                  | 0.02                 | 0.01                 |
|           | CC | 2.32   | (1.55,3.47) | 4.71x10 <sup>-5</sup>  |                        |                       | 0.77 | (0.54,1.09)  | 0.14                  |                      |                      |
| rs4821481 | TC | 0.85   | (0.57,1.28) | 0.43                   | 1.24x10 <sup>-14</sup> | 0.44                  | 0.61 | (0.44,0.86)  | 0.49x10 <sup>-3</sup> | 0.02                 | 0.005                |
|           | CC | 2.11   | (1.42,3.13) | 2.24x10 <sup>-4</sup>  |                        |                       | 0.73 | (0.51,1.03)  | 0.07                  |                      |                      |
| rs3752462 | CT | 1.23   | (0.67,2.23) | 0.50                   | 1.91x10 <sup>-10</sup> | 0.50                  | 0.67 | (0.43,1.06)  | 0.09                  | 0.18                 | 0.09                 |
|           | TT | 2.53   | (1.41,4.53) | 1.80x10 <sup>-3</sup>  |                        |                       | 0.77 | (0.49,1.20)  | 0.24                  |                      |                      |
| rs5756152 | AG | 1.56   | (1.24,1.97) | 1.66x10 <sup>-4</sup>  | 1.09x10 <sup>-11</sup> | 1.58x10 <sup>-4</sup> | 0.97 | (0.78,1.22)  | 0.82                  | 0.37                 | 0.82                 |
|           | AA | 3.22   | (2.29,4.51) | 1.26x10 <sup>-11</sup> |                        |                       | 1.27 | (0.88,1.83)  | 0.20                  |                      |                      |

|            |    |      |             |                        |                        |                       |      |             |      |      |      |
|------------|----|------|-------------|------------------------|------------------------|-----------------------|------|-------------|------|------|------|
| rs1005570  | AG | 1.27 | (0.97,1.66) | 0.08                   | $2.59 \times 10^{-13}$ | 0.08                  | 0.93 | (0.73,1.19) | 0.58 | 0.16 | 0.58 |
|            | AA | 2.86 | (2.12,3.86) | $4.73 \times 10^{-12}$ |                        |                       | 1.21 | (0.90,1.63) | 0.20 |      |      |
| rs16996674 | TC | 1.75 | (1.39,2.20) | $2.22 \times 10^{-6}$  | $3.21 \times 10^{-14}$ | $2.06 \times 10^{-6}$ | 1.11 | (0.88,1.39) | 0.38 | 0.09 | 0.38 |
|            | TT | 3.96 | (2.70,5.80) | $1.57 \times 10^{-12}$ |                        |                       | 1.57 | (1.04,2.38) | 0.03 |      |      |
| rs16996677 | AG | 1.63 | (1.29,2.05) | $4.06 \times 10^{-5}$  | $5.48 \times 10^{-14}$ | $3.83 \times 10^{-5}$ | 1.05 | (0.84,1.31) | 0.67 | 0.09 | 0.67 |
|            | AA | 3.82 | (2.67,5.47) | $2.21 \times 10^{-13}$ |                        |                       | 1.53 | (1.04,2.25) | 0.03 |      |      |

\*odds ratio adjusted for global ancestry

P value 1 represents genotypic-specific p value derived from the Wald test using a general genetic model

P value 2 represents p value derived from the likelihood ratio test (LRT) comparing the general model with three-genotype risk model to the null model (all genotypic risks are constrained to be 1)

P value 3 represents p value derived from the LRT comparing the general model with three-genotype risk model to a two-genotype risk model (assuming recessive genetic effect)

Supplementary Table 2 Odds ratios (OR) adjusted for global and local ancestry and 95% confidence interval (95% CI) of non-diabetic (Non-DM) and diabetic (DM) ESRD for 14 MYH9 SNPs assuming three genotype-specific risks

| SNP        | Non-DM |              |                       |                       | DM   |              |          |          |
|------------|--------|--------------|-----------------------|-----------------------|------|--------------|----------|----------|
|            | OR     | 95% CI       | P value1              | P value2              | OR   | 95% CI       | P value1 | P value2 |
| rs7078     | 0.73   | (0.29,1.82)  | 0.50                  | 5.52x10 <sup>-5</sup> | 0.57 | (0.27,1.19)  | 0.13     | 0.04     |
|            | 1.34   | (0.55,3.27)  | 0.52                  |                       | 0.76 | (0.37,1.57)  | 0.46     |          |
| rs12107    | 0.35   | (0.11,1.15)  | 0.08                  | 8.63x10 <sup>-3</sup> | 0.76 | (0.22,2.54)  | 0.65     | 0.64     |
|            | 0.55   | (0.17, 1.76) | 0.31                  |                       | 0.68 | (0.21,2.25)  | 0.53     |          |
| rs735853   | 0.64   | (0.20, 2.00) | 0.44                  | 0.25                  | 0.71 | (0.31,1.62)  | 0.41     | 0.42     |
|            | 0.86   | (0.27, 2.79) | 0.81                  |                       | 0.60 | (0.26,1.43)  | 0.25     |          |
| rs5756129  | 1.31   | (0.63,2.74)  | 0.47                  | 1.15x10 <sup>-4</sup> | 0.62 | (0.36,1.08)  | 0.09     | 0.23     |
|            | 2.12   | (1.03,4.36)  | 0.04                  |                       | 0.69 | (0.4,1.17)   | 0.17     |          |
| rs5756130  | 1.01   | (0.32,3.18)  | 0.99                  | 3.91x10 <sup>-3</sup> | 0.56 | (0.22,1.4)   | 0.21     | 0.45     |
|            | 1.60   | (0.52, 4.95) | 0.41                  |                       | 0.57 | (0.23,1.42)  | 0.23     |          |
| rs875725   | 0.38   | (0.03,4.24)  | 0.43                  | 0.41                  | 1.00 | (0.06,16.39) | 1.00     | 0.86     |
|            | 0.46   | (0.04, 5.09) | 0.53                  |                       | 0.92 | (0.06,14.81) | 0.95     |          |
| rs4821480  | 0.83   | (0.53, 1.30) | 0.41                  | 4.39x10 <sup>-5</sup> | 0.68 | (0.46,1.01)  | 0.06     | 0.16     |
|            | 1.68   | (1.00, 2.84) | 0.05                  |                       | 0.69 | (0.43,1.11)  | 0.13     |          |
| rs2032487  | 0.87   | (0.56,1.91)  | 0.54                  | 1.13x10 <sup>-7</sup> | 0.64 | (0.45,0.92)  | 0.02     | 0.02     |
|            | 1.94   | (1.17, 3.23) | 0.01                  |                       | 0.80 | (0.52,1.23)  | 0.31     |          |
| rs4821481  | 0.75   | (0.49, 1.16) | 0.19                  | 6.19x10 <sup>-8</sup> | 0.62 | (0.43,0.89)  | 0.01     | 0.02     |
|            | 1.64   | (1.00, 2.68) | 0.05                  |                       | 0.74 | (0.49,1.13)  | 0.16     |          |
| rs3752462  | 1.04   | (0.56,1.91)  | 0.91                  | 1.00x10 <sup>-4</sup> | 0.67 | (0.42,1.07)  | 0.10     | 0.18     |
|            | 1.80   | (0.96,3.38)  | 0.07                  |                       | 0.77 | (0.47,1.26)  | 0.29     |          |
| rs5756152  | 1.42   | (1.12,1.81)  | 3.94x10 <sup>-3</sup> | 1.35x10 <sup>-7</sup> | 0.99 | (0.78,1.25)  | 0.93     | 0.33     |
|            | 2.71   | (1.90,3.88)  | 4.45x10 <sup>-8</sup> |                       | 1.31 | (0.89,1.92)  | 0.17     |          |
| rs1005570  | 1.15   | (0.88,1.52)  | 0.31                  | 1.40x10 <sup>-8</sup> | 0.94 | (0.73,1.21)  | 0.63     | 0.16     |
|            | 2.38   | (1.72, 3.29) | 1.67x10 <sup>-7</sup> |                       | 1.23 | (0.9,1.69)   | 0.19     |          |
| rs16996674 | 1.61   | (1.27,2.05)  | 9.06x10 <sup>-5</sup> | 5.1x10 <sup>-10</sup> | 1.12 | (0.89,1.42)  | 0.33     | 0.08     |
|            | 3.41   | (2.29, 5.07) | 1.59x10 <sup>-9</sup> |                       | 1.62 | (1.06,2.49)  | 0.03     |          |
| rs16996677 | 1.48   | (1.16,1.88)  | 1.40x10 <sup>-3</sup> | 2.48x10 <sup>-9</sup> | 1.07 | (0.85,1.35)  | 0.58     | 0.08     |
|            | 3.21   | (2.20, 4.67) | 1.43x10 <sup>-9</sup> |                       | 1.59 | (1.06,2.37)  | 0.02     |          |

\*odds ratio adjusted for global and local ancestry

P value 1 represents genotype-specific p value derived from the Wald test

P value 2 represents p value derived from the likelihood ratio test (LRT) of comparing a three-genotype risk model to null model (all genotypic risks are constrained to be 1)

Supplementary Table 3. Adjusted odds ratio and 95% confidence interval comparing odds of having two copies of the at-risk alleles among non-diabetic ESRD to diabetic ESRD (case-case comparison)

| SNP        | Position | OR   | 95%CI       | p-value                |
|------------|----------|------|-------------|------------------------|
| rs7078     | 35007860 | 1.55 | (1.18,2.04) | 1.67x10 <sup>-3</sup>  |
| rs12107    | 35007928 | 1.76 | (1.29,2.39) | 3.38x10 <sup>-4</sup>  |
| rs735853   | 35009161 | 2.07 | (1.49,2.88) | 1.37x10 <sup>-5</sup>  |
| rs5756129  | 35014038 | 1.64 | (1.29,2.1)  | 7.21x10 <sup>-5</sup>  |
| rs5756130  | 35014277 | 1.60 | (1.21,2.13) | 1.11x10 <sup>-3</sup>  |
| rs875725   | 35021637 | 1.30 | (0.92,1.83) | 0.14                   |
| rs4821480  | 35025193 | 2.29 | (1.79,2.94) | 7.31x10 <sup>-11</sup> |
| rs2032487  | 35025374 | 2.19 | (1.75,2.76) | 1.46x10 <sup>-11</sup> |
| rs4821481  | 35025888 | 2.25 | (1.8,2.82)  | 1.46x10 <sup>-12</sup> |
| rs3752462  | 35040129 | 1.96 | (1.55,2.47) | 1.21x10 <sup>-8</sup>  |
| rs5756152  | 35042418 | 2.06 | (1.51,2.82) | 5.70x10 <sup>-6</sup>  |
| rs1005570  | 35045220 | 1.95 | (1.53,2.48) | 6.46x10 <sup>-8</sup>  |
| rs16996674 | 35056598 | 2.08 | (1.47,2.94) | 3.23x10 <sup>-5</sup>  |
| rs16996677 | 35057229 | 2.05 | (1.49,2.83) | 1.01x10 <sup>-5</sup>  |

\*odds ratio adjusted for global ancestry

Supplementary Table 4 Breslow-Day test of heterogeneity of association between MYH9 SNPs and ESRD case-control status by diabetes status (unadjusted)

| SNP        | Position | Breslow-Day P value   |
|------------|----------|-----------------------|
| rs7078     | 35007860 | 0.21                  |
| rs12107    | 35007928 | 0.34                  |
| rs735853   | 35009161 | $5.38 \times 10^{-4}$ |
| rs5756129  | 35014038 | 0.02                  |
| rs5756130  | 35014277 | 0.08                  |
| rs875725   | 35021637 | 0.74                  |
| rs4821480  | 35025193 | $1.21 \times 10^{-5}$ |
| rs2032487  | 35025374 | $1.93 \times 10^{-5}$ |
| rs4821481  | 35025888 | $3.32 \times 10^{-6}$ |
| rs3752462  | 35040129 | $3.13 \times 10^{-3}$ |
| rs5756152  | 35042418 | 0.18                  |
| rs1005570  | 35045220 | 0.38                  |
| rs16996674 | 35056598 | 0.52                  |
| rs16996677 | 35057229 | 0.16                  |

## Supplementary Table 5

We were interested in understanding how the chromosome 22 locus contributes to non-diabetic ESRD in African Americans. Specifically, we asked: “If it were possible to reduce the prevalence of non-diabetic ESRD in African Americans, to what would be expected if everyone had inherited entirely European ancestry at the locus, what would be the change in incidence?”

We calculated a LOD score at the peak locus on chromosome 22, for 50 multiplicative risk models, ranging from 0.24 to 0.73 in increments of 0.01. The peak LOD is at 0.50, but we were also interested in a probability distribution, which we obtained by taking 10 to the power of the LOD score (figure below). The 95% confidence interval (the central 95% of the distribution, which is equivalent to the region where the LOD is within 0.834 of the maximum) is 0.39-0.63.

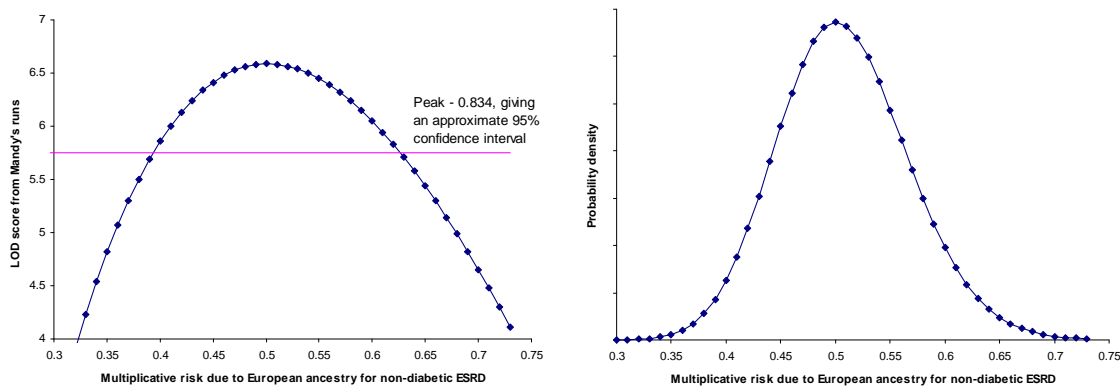

To calculate the effect on non-diabetic ESRD risk of the presence of African ancestry versus European ancestry at the chromosome 22 locus in the African American population, we compared the risk for non-diabetic ESRD averaged over all African Americans in the population (which has 16.9% European ancestry on average), to what would be expected if there was entirely European ancestry at the locus. The table below shows the calculation:

| Supplemental Table 5: effect of chromosome 22 locus on non-diabetic ESRD prevalence in African Americans |                                                                                                         |                                                  |                                                |
|----------------------------------------------------------------------------------------------------------|---------------------------------------------------------------------------------------------------------|--------------------------------------------------|------------------------------------------------|
| # African alleles                                                                                        | Frequency of genotype in population (estimated from controls, who have 17.1% European ancestry overall) | Increased risk compared to all European ancestry | Weighted risk (product of two columns on left) |
| 0                                                                                                        | 2.9%                                                                                                    | 0.25                                             | 0.007                                          |
| 1                                                                                                        | 28.1%                                                                                                   | 0.5                                              | 0.140                                          |
| 2                                                                                                        | 69.1%                                                                                                   | 1                                                | 0.691                                          |

Total risk vs. a population of all African ancestry

0.838

From this calculation, we calculate that if it were possible to reduce the prevalence of non-diabetic ESRD to what would be expected if everyone had inherited

entirely European ancestry at the locus, the prevalence would be reduced to  $0.25/0.838 = 30\%$  of its value in the population (a 70% reduction; corresponding to a relative rate of  $0.838/0.250=3.3$ ). Using the 95% confidence interval of 0.39-0.63 for the ancestry risk and repeating the same calculation for the two bounds, the 95% confidence interval for the reduction is 19%-45%. This estimate accounts for much of the total excess risk of non-diabetic ESRD in African-Americans compared to Whites. A caveat is that the effect of this locus on non-diabetic ESRD risk is likely to be somewhat overestimated because of the “winner’s curse”: the phenomenon whereby the strength of a locus that happens to be genome-wide significant tends to be higher than its true value because of its ascertainment as the strongest signal from this particular genome-wide admixture panel. However, the signal of association at chromosome 22 is sufficiently strong that the locus would probably have been discovered even with a substantially smaller size.

| Supplementary Table 6 Physical position and call rates for 1354 ancestry informative markers used in the admixture scan |         |        |              |           |
|-------------------------------------------------------------------------------------------------------------------------|---------|--------|--------------|-----------|
| SNP                                                                                                                     | Alleles | Chromo | Phy_Position | Call rate |
| rs819980                                                                                                                | T/C     | 1      | 1510967      | 0.99222   |
| rs897634                                                                                                                | C/T     | 1      | 2858849      | 0.997254  |
| rs2817159                                                                                                               | A/G     | 1      | 3172565      | 0.991762  |
| rs7548756                                                                                                               | A/C     | 1      | 4080622      | 0.99405   |
| rs12076190                                                                                                              | A/G     | 1      | 5763305      | 0.997254  |
| rs3007429                                                                                                               | C/T     | 1      | 6485958      | 0.99405   |
| rs873433                                                                                                                | G/C     | 1      | 7575654      | 0.998627  |
| rs1234694                                                                                                               | A/G     | 1      | 9937586      | 0.967506  |
| rs3765337                                                                                                               | G/T     | 1      | 12276865     | 0.998169  |
| rs2999896                                                                                                               | C/T     | 1      | 13570501     | 0.999085  |
| rs10803326                                                                                                              | T/C     | 1      | 15018051     | 0.999542  |
| rs4661630                                                                                                               | G/A     | 1      | 15542976     | 1         |
| rs4920311                                                                                                               | C/G     | 1      | 18309297     | 0.997712  |
| rs7522389                                                                                                               | G/T     | 1      | 19718664     | 0.989931  |
| rs908502                                                                                                                | A/G     | 1      | 22946546     | 0.996796  |
| rs2156087                                                                                                               | C/G     | 1      | 23488887     | 0.999542  |
| rs4908343                                                                                                               | A/G     | 1      | 27615840     | 0.995423  |
| rs6694545                                                                                                               | A/G     | 1      | 30106361     | 0.998627  |
| rs4949198                                                                                                               | A/C     | 1      | 31350707     | 1         |
| rs359955                                                                                                                | A/C     | 1      | 32803867     | 0.998627  |
| rs12058538                                                                                                              | C/T     | 1      | 35154678     | 0.999542  |
| rs7530031                                                                                                               | C/T     | 1      | 37551253     | 0.998169  |
| rs260972                                                                                                                | C/T     | 1      | 39219303     | 0.990847  |
| rs710232                                                                                                                | A/G     | 1      | 41872247     | 0.997712  |
| rs12410334                                                                                                              | A/C     | 1      | 44111614     | 0.998169  |
| rs667016                                                                                                                | A/T     | 1      | 47723356     | 0.997712  |
| rs10399937                                                                                                              | C/T     | 1      | 53195452     | 0.997712  |
| rs6663966                                                                                                               | C/T     | 1      | 53782034     | 0.996339  |
| rs1418978                                                                                                               | C/T     | 1      | 56683745     | 0.995881  |
| rs563921                                                                                                                | A/G     | 1      | 57314404     | 0.981236  |
| rs2984915                                                                                                               | A/G     | 1      | 58965716     | 0.999542  |
| rs2985879                                                                                                               | T/C     | 1      | 59212774     | 0.963387  |
| rs10789091                                                                                                              | A/C     | 1      | 61153343     | 0.984897  |
| rs596985                                                                                                                | A/G     | 1      | 63989056     | 1         |
| rs1158573                                                                                                               | A/T     | 1      | 71979575     | 0.997254  |
| rs6662385                                                                                                               | C/T     | 1      | 72885596     | 0.999542  |
| rs11210458                                                                                                              | A/G     | 1      | 74590146     | 0.998169  |
| rs10874142                                                                                                              | G/T     | 1      | 80746801     | 0.98627   |
| rs12067308                                                                                                              | C/T     | 1      | 82677904     | 1         |
| rs11161435                                                                                                              | A/T     | 1      | 84918127     | 0.998627  |
| rs974843                                                                                                                | A/G     | 1      | 86727200     | 1         |



Supplementary Table 6 Physical position and call rates for 1354 ancestry informative markers used in the admixture scan

| SNP        | Alleles | Chromo | Phy_Position | Call rate |
|------------|---------|--------|--------------|-----------|
| rs1334336  | C/T     | 1      | 88104461     | 0.994508  |
| rs236307   | A/G     | 1      | 93794938     | 0.996796  |
| rs290829   | A/G     | 1      | 97163698     | 0.996796  |
| rs947726   | G/C     | 1      | 99572306     | 0.999542  |
| rs1389383  | A/G     | 1      | 99986691     | 0.978032  |
| rs11164273 | C/T     | 1      | 101882316    | 0.999542  |
| rs4311917  | A/C     | 1      | 107437785    | 0.998169  |
| rs345275   | A/T     | 1      | 108205845    | 0.998627  |
| rs2003154  | A/G     | 1      | 110462319    | 0.998169  |
| rs2365669  | A/G     | 1      | 112074687    | 0.985355  |
| rs7523839  | A/C     | 1      | 115885122    | 0.999542  |
| rs798006   | G/T     | 1      | 117057230    | 0.999542  |
| rs10910821 | G/A     | 1      | 143006107    | 0.996796  |
| rs11240089 | G/A     | 1      | 144285330    | 0.999542  |
| rs10127622 | G/T     | 1      | 148281133    | 0.995423  |
| rs6662563  | A/G     | 1      | 149286000    | 0.998169  |
| rs12740969 | A/C     | 1      | 151300133    | 1         |
| rs2768744  | A/G     | 1      | 153685222    | 0.994966  |
| rs2814778  | C/T     | 1      | 155987756    | 0.999085  |
| rs1962508  | A/C     | 1      | 158677077    | 0.999085  |
| rs2806424  | A/G     | 1      | 159423117    | 0.998169  |
| rs6426893  | T/C     | 1      | 161759000    | 0.994966  |
| rs919679   | T/C     | 1      | 162988820    | 0.997712  |
| rs10918844 | A/G     | 1      | 164904282    | 0.932265  |
| rs9425309  | C/T     | 1      | 169118347    | 0.999085  |
| rs6686083  | A/T     | 1      | 170684196    | 0.999542  |
| rs10753143 | A/G     | 1      | 173828898    | 0.998169  |
| rs4652291  | C/T     | 1      | 174760368    | 0.998169  |
| rs10911170 | C/T     | 1      | 179666579    | 0.999085  |
| rs4631655  | C/G     | 1      | 181092973    | 0.998169  |
| rs726777   | A/T     | 1      | 182604480    | 0.99222   |
| rs6428291  | C/G     | 1      | 186057994    | 1         |
| rs1923949  | A/G     | 1      | 189279367    | 0.999542  |
| rs2506081  | C/T     | 1      | 190832629    | 0.997254  |
| rs1008984  | C/T     | 1      | 195062228    | 0.994508  |
| rs3006246  | A/C     | 1      | 196763737    | 0.998169  |
| rs1361903  | A/G     | 1      | 198030491    | 0.999542  |
| rs1774832  | C/T     | 1      | 199700971    | 0.999085  |
| rs7530895  | A/G     | 1      | 199992413    | 0.994508  |
| rs1553921  | G/T     | 1      | 201170300    | 0.993593  |
| rs1781022  | A/G     | 1      | 204852990    | 0.993593  |
| rs1340117  | A/C     | 1      | 205219006    | 0.994508  |

Supplementary Table 6 Physical position and call rates for 1354 ancestry informative markers used in the admixture scan

| SNP        | Alleles | Chromo | Phy_Position | Call rate |
|------------|---------|--------|--------------|-----------|
| rs979698   | C/T     | 1      | 206085842    | 0.998169  |
| rs723632   | C/G     | 1      | 210448147    | 0.994508  |
| rs2666839  | A/G     | 1      | 211204619    | 0.999085  |
| rs6604611  | A/C     | 1      | 213043646    | 0.998169  |
| rs779048   | C/T     | 1      | 215499016    | 0.999542  |
| rs2008602  | A/G     | 1      | 216420713    | 0.99405   |
| rs1110379  | A/G     | 1      | 221407389    | 0.998169  |
| rs493950   | A/G     | 1      | 224913700    | 0.998627  |
| rs6587361  | A/G     | 1      | 226325783    | 0.999542  |
| rs9661417  | A/G     | 1      | 228691786    | 0.999542  |
| rs701185   | A/C     | 1      | 229654721    | 0.998169  |
| rs2045520  | G/T     | 1      | 230610704    | 0.999542  |
| rs6586395  | A/C     | 1      | 230955554    | 0.994966  |
| rs630101   | A/G     | 1      | 233098457    | 0.996796  |
| rs2485579  | A/G     | 1      | 233597673    | 1         |
| rs10925911 | T/G     | 1      | 236034353    | 0.991304  |
| rs7525142  | A/C     | 1      | 237068946    | 0.999542  |
| rs9428863  | A/G     | 1      | 237597268    | 0.999085  |
| rs7520214  | A/T     | 1      | 239393484    | 0.999085  |
| rs562642   | C/T     | 1      | 240756186    | 1         |
| rs9725312  | A/C     | 1      | 241364859    | 0.998627  |
| rs6426327  | T/C     | 1      | 242415852    | 0.999542  |
| rs2387370  | T/G     | 1      | 244473690    | 0.967963  |
| rs6587761  | T/C     | 1      | 245407811    | 0.998627  |
| rs1996398  | A/C     | 2      | 171196       | 1         |
| rs11897977 | A/G     | 2      | 1363732      | 0.993593  |
| rs10165834 | C/G     | 2      | 3183074      | 0.995881  |
| rs825943   | A/T     | 2      | 4295922      | 0.983066  |
| rs9309717  | A/G     | 2      | 5033361      | 0.995881  |
| rs1852319  | A/G     | 2      | 6203183      | 0.99222   |
| rs12990806 | C/T     | 2      | 7037687      | 0.985812  |
| rs798443   | A/G     | 2      | 7918873      | 0.998627  |
| rs1344185  | A/G     | 2      | 9240922      | 0.998627  |
| rs1882646  | A/G     | 2      | 10982386     | 0.997254  |
| rs962646   | A/G     | 2      | 12337858     | 0.999542  |
| rs311992   | G/T     | 2      | 13442666     | 0.996796  |
| rs2380549  | A/G     | 2      | 14058476     | 0.999085  |
| rs6733850  | C/T     | 2      | 15881549     | 0.991762  |
| rs810066   | G/T     | 2      | 16811000     | 1         |
| rs11676404 | C/T     | 2      | 18291199     | 0.997712  |
| rs921599   | A/G     | 2      | 20712753     | 0.99405   |
| rs7588415  | T/C     | 2      | 21045289     | 0.999542  |

Supplementary Table 6 Physical position and call rates for 1354 ancestry informative markers used in the admixture scan

| SNP        | Alleles | Chromo | Phy_Position | Call rate |
|------------|---------|--------|--------------|-----------|
| rs736442   | C/T     | 2      | 21531921     | 0.999542  |
| rs13025681 | C/T     | 2      | 26660155     | 0.993135  |
| rs7593448  | C/G     | 2      | 27360944     | 0.999085  |
| rs2631941  | A/G     | 2      | 29892937     | 0.98627   |
| rs6548031  | A/C     | 2      | 30896322     | 0.977117  |
| rs11124405 | A/G     | 2      | 35099662     | 0.999542  |
| rs11689624 | C/G     | 2      | 36881404     | 0.998627  |
| rs10203995 | A/G     | 2      | 39076705     | 0.997712  |
| rs3924521  | A/G     | 2      | 45906832     | 0.998169  |
| rs7582701  | G/C     | 2      | 46462420     | 0.997254  |
| rs1316521  | C/T     | 2      | 49151793     | 0.999085  |
| rs6545265  | C/G     | 2      | 52378781     | 0.998627  |
| rs4672145  | T/C     | 2      | 56817815     | 0.998169  |
| rs13409341 | A/C     | 2      | 57839911     | 0.999085  |
| rs4643526  | A/G     | 2      | 61096302     | 0.998169  |
| rs12622045 | A/G     | 2      | 65767523     | 0.996796  |
| rs2861060  | A/T     | 2      | 66555000     | 0.998169  |
| rs4267542  | A/C     | 2      | 69142701     | 0.998169  |
| rs3768641  | C/G     | 2      | 72279845     | 1         |
| rs3025991  | C/T     | 2      | 74811462     | 0.985812  |
| rs7557290  | C/T     | 2      | 77424226     | 0.999542  |
| rs17640561 | G/T     | 2      | 78431705     | 0.998627  |
| rs1444543  | A/G     | 2      | 80585272     | 0.997254  |
| rs4852696  | C/G     | 2      | 83063299     | 1         |
| rs1025104  | C/T     | 2      | 86262322     | 0.998627  |
| rs1320149  | C/T     | 2      | 96915751     | 0.998627  |
| rs11674146 | A/C     | 2      | 104416629    | 0.998627  |
| rs10171578 | A/C     | 2      | 104724982    | 0.999085  |
| rs700853   | C/T     | 2      | 107812646    | 0.978947  |
| rs260714   | C/T     | 2      | 109021013    | 0.998627  |
| rs13426054 | A/G     | 2      | 111194197    | 0.999085  |
| rs11890727 | C/G     | 2      | 114383724    | 0.999542  |
| rs1437430  | A/C     | 2      | 117482567    | 0.989474  |
| rs10191837 | A/G     | 2      | 118681163    | 0.996796  |
| rs287790   | A/G     | 2      | 122093087    | 0.994508  |
| rs6750983  | A/G     | 2      | 122995486    | 0.999542  |
| rs6733255  | C/T     | 2      | 127378616    | 0.995881  |
| rs1545216  | A/G     | 2      | 129811353    | 0.999085  |
| rs2625051  | A/G     | 2      | 131346589    | 0.996796  |
| rs218174   | A/G     | 2      | 136492077    | 0.976201  |
| rs4954540  | C/T     | 2      | 138389237    | 0.997254  |
| rs6705862  | A/G     | 2      | 139227101    | 0.999085  |

Supplementary Table 6 Physical position and call rates for 1354 ancestry informative markers used in the admixture scan

| SNP        | Alleles | Chromo | Phy_Position | Call rate |
|------------|---------|--------|--------------|-----------|
| rs7591743  | A/T     | 2      | 143110500    | 0.965217  |
| rs4662260  | A/G     | 2      | 147183110    | 0.999085  |
| rs1979038  | A/G     | 2      | 149044630    | 0.998627  |
| rs6733811  | C/T     | 2      | 152371653    | 0.999085  |
| rs723802   | A/C     | 2      | 157501974    | 0.990389  |
| rs12472133 | C/T     | 2      | 158590538    | 0.997254  |
| rs901303   | C/T     | 2      | 163241954    | 0.988101  |
| rs1676038  | A/G     | 2      | 164075818    | 0.995881  |
| rs1600148  | A/G     | 2      | 168013254    | 0.997712  |
| rs11678181 | C/G     | 2      | 169284880    | 0.999542  |
| rs10930443 | C/T     | 2      | 171545343    | 0.997254  |
| rs12466967 | A/C     | 2      | 174169587    | 0.995423  |
| rs13000048 | T/G     | 2      | 178162596    | 0.999085  |
| rs256550   | C/T     | 2      | 190570244    | 0.999085  |
| rs2271767  | C/T     | 2      | 192104833    | 0.996339  |
| rs6710083  | G/T     | 2      | 192598098    | 0.999085  |
| rs6748661  | A/G     | 2      | 195508346    | 0.996796  |
| rs6434811  | C/T     | 2      | 196691926    | 0.974828  |
| rs920249   | A/C     | 2      | 201137835    | 0.997712  |
| rs10932088 | A/G     | 2      | 205537917    | 0.997712  |
| rs7573626  | A/G     | 2      | 206169372    | 0.998169  |
| rs1362663  | A/C     | 2      | 206595095    | 0.999542  |
| rs288079   | A/T     | 2      | 210260982    | 1         |
| rs1473636  | C/T     | 2      | 212707696    | 1         |
| rs920525   | A/G     | 2      | 213812201    | 0.998169  |
| rs11894175 | C/T     | 2      | 215052530    | 0.997712  |
| rs3755152  | A/G     | 2      | 216647703    | 0.997254  |
| rs16859382 | A/G     | 2      | 219519361    | 0.997254  |
| rs2385622  | C/T     | 2      | 220525617    | 0.988558  |
| rs6761192  | A/G     | 2      | 222473394    | 0.993593  |
| rs4674659  | A/C     | 2      | 223187985    | 0.991304  |
| rs744396   | G/T     | 2      | 224396286    | 0.996339  |
| rs6735031  | A/G     | 2      | 230108815    | 0.999085  |
| rs11690414 | A/C     | 2      | 231433209    | 0.998627  |
| rs1868929  | C/T     | 2      | 232009096    | 0.999085  |
| rs2215173  | A/G     | 2      | 234637171    | 1         |
| rs1027868  | A/G     | 2      | 235038745    | 1         |
| rs935925   | G/T     | 2      | 236996545    | 0.999542  |
| rs6747043  | C/G     | 2      | 238116251    | 1         |
| rs907109   | C/T     | 2      | 239348309    | 0.98032   |
| rs12471078 | C/G     | 2      | 240715255    | 1         |
| rs7420176  | A/G     | 2      | 242721029    | 0.996796  |

Supplementary Table 6 Physical position and call rates for 1354 ancestry informative markers used in the admixture scan

| SNP        | Alleles | Chromo | Phy_Position | Call rate |
|------------|---------|--------|--------------|-----------|
| rs4684404  | T/C     | 3      | 412533       | 0.999542  |
| rs155412   | A/G     | 3      | 1329463      | 0.999085  |
| rs12638122 | A/T     | 3      | 2751808      | 0.999085  |
| rs7644488  | A/G     | 3      | 3533481      | 0.996796  |
| rs1352405  | C/G     | 3      | 3887946      | 1         |
| rs11130135 | A/G     | 3      | 4784618      | 0.989474  |
| rs1811510  | G/T     | 3      | 5750231      | 0.998169  |
| rs9825026  | A/G     | 3      | 9092788      | 0.979405  |
| rs638107   | C/G     | 3      | 10473198     | 0.999085  |
| rs11719375 | C/T     | 3      | 10681597     | 0.990847  |
| rs7627605  | A/G     | 3      | 12374270     | 0.997712  |
| rs3762721  | C/T     | 3      | 13870807     | 0.996339  |
| rs6442608  | C/T     | 3      | 16563277     | 0.998169  |
| rs7652410  | T/C     | 3      | 22008145     | 0.999085  |
| rs1349265  | A/G     | 3      | 24134391     | 0.998169  |
| rs6763642  | A/G     | 3      | 26724657     | 0.999085  |
| rs2197896  | A/G     | 3      | 30007534     | 0.999085  |
| rs7619670  | A/G     | 3      | 31361236     | 0.996796  |
| rs9838282  | A/C     | 3      | 35889593     | 0.998627  |
| rs6550406  | T/A     | 3      | 36193079     | 0.990389  |
| rs1122818  | A/G     | 3      | 39116100     | 0.997712  |
| rs3821372  | T/C     | 3      | 39523375     | 0.999085  |
| rs4687591  | T/C     | 3      | 53839447     | 0.999085  |
| rs9856661  | A/C     | 3      | 54052296     | 0.999542  |
| rs9825091  | C/T     | 3      | 56771066     | 0.998169  |
| rs9811612  | C/G     | 3      | 59175320     | 0.994966  |
| rs1562521  | C/T     | 3      | 60854734     | 0.995423  |
| rs7622872  | A/G     | 3      | 61277754     | 0.998627  |
| rs833660   | C/T     | 3      | 62527834     | 0.999542  |
| rs13093187 | A/G     | 3      | 64487122     | 0.997712  |
| rs12635307 | A/C     | 3      | 66603496     | 0.998627  |
| rs1288980  | A/G     | 3      | 71188553     | 0.959268  |
| rs11721278 | A/T     | 3      | 72676000     | 1         |
| rs682415   | T/C     | 3      | 74382798     | 0.999542  |
| rs1027402  | A/G     | 3      | 76435516     | 0.998627  |
| rs1494255  | A/G     | 3      | 87531066     | 0.984897  |
| rs9784387  | C/T     | 3      | 98410453     | 0.995881  |
| rs2623382  | C/T     | 3      | 100550148    | 0.999085  |
| rs12489482 | A/G     | 3      | 106062098    | 0.999085  |
| rs1163447  | A/C     | 3      | 110539441    | 0.999085  |
| rs1477844  | C/G     | 3      | 112312521    | 0.99405   |
| rs9288952  | A/G     | 3      | 113667715    | 0.998169  |

Supplementary Table 6 Physical position and call rates for 1354 ancestry informative markers used in the admixture scan

| SNP        | Alleles | Chromo | Phy_Position | Call rate |
|------------|---------|--------|--------------|-----------|
| rs6806816  | A/G     | 3      | 116691828    | 0.999085  |
| rs7431707  | C/T     | 3      | 117464606    | 0.978032  |
| rs12695349 | T/C     | 3      | 118639153    | 0.973455  |
| rs1909808  | C/T     | 3      | 123808157    | 0.997712  |
| rs1254401  | C/G     | 3      | 124836431    | 0.998169  |
| rs735739   | A/C     | 3      | 127476231    | 0.995423  |
| rs2811337  | C/G     | 3      | 131065582    | 0.999542  |
| rs1027858  | A/C     | 3      | 131785884    | 0.992677  |
| rs4955503  | A/G     | 3      | 136019145    | 1         |
| rs641320   | T/C     | 3      | 139830655    | 0.999542  |
| rs7645419  | A/C     | 3      | 141357292    | 0.997712  |
| rs3796259  | C/T     | 3      | 142461619    | 0.998627  |
| rs12497227 | G/T     | 3      | 145043228    | 0.995423  |
| rs7641230  | C/G     | 3      | 145976480    | 1         |
| rs7646807  | A/G     | 3      | 149664564    | 0.910297  |
| rs6800064  | C/T     | 3      | 152409466    | 0.995881  |
| rs1439013  | C/T     | 3      | 154064689    | 0.999085  |
| rs181696   | A/G     | 3      | 156748806    | 0.998627  |
| rs6796127  | A/G     | 3      | 157597600    | 0.995423  |
| rs1978831  | A/T     | 3      | 160796348    | 1         |
| rs6803163  | C/T     | 3      | 169410958    | 0.998627  |
| rs9290364  | A/G     | 3      | 170477884    | 0.999542  |
| rs9647366  | G/T     | 3      | 172568426    | 0.976201  |
| rs13099104 | G/T     | 3      | 174130869    | 0.999085  |
| rs9868994  | C/T     | 3      | 176215783    | 0.997712  |
| rs6802083  | G/T     | 3      | 176884416    | 0.996339  |
| rs1978396  | A/G     | 3      | 179085862    | 0.998627  |
| rs2567648  | C/G     | 3      | 182441386    | 0.999085  |
| rs9834934  | C/T     | 3      | 187204374    | 0.995423  |
| rs9823203  | A/C     | 3      | 188357343    | 0.999085  |
| rs3846193  | G/T     | 3      | 190150867    | 0.999542  |
| rs6793627  | C/T     | 3      | 190527001    | 0.986728  |
| rs7624080  | C/T     | 3      | 192069680    | 0.997254  |
| rs7653308  | C/T     | 3      | 193645753    | 0.998169  |
| rs4677637  | A/G     | 3      | 195956225    | 0.996796  |
| rs6782303  | A/G     | 3      | 199134546    | 0.994508  |
| rs6827536  | C/T     | 4      | 3716460      | 0.999085  |
| rs3821920  | A/T     | 4      | 5459672      | 0.999542  |
| rs3774883  | A/G     | 4      | 5944669      | 0.998627  |
| rs4689327  | C/T     | 4      | 6188748      | 0.997712  |
| rs17728492 | C/G     | 4      | 6895942      | 0.999085  |
| rs4696778  | G/C     | 4      | 8037379      | 1         |

Supplementary Table 6 Physical position and call rates for 1354 ancestry informative markers used in the admixture scan

| SNP        | Alleles | Chromo | Phy_Position | Call rate |
|------------|---------|--------|--------------|-----------|
| rs4552452  | A/G     | 4      | 10100592     | 1         |
| rs4697843  | T/C     | 4      | 10772027     | 0.999542  |
| rs6825164  | G/T     | 4      | 12118100     | 0.989474  |
| rs758973   | A/C     | 4      | 13215642     | 0.99405   |
| rs2872795  | A/G     | 4      | 17006650     | 1         |
| rs2724478  | G/C     | 4      | 17731408     | 0.999085  |
| rs9291432  | T/C     | 4      | 21656772     | 1         |
| rs7689639  | A/G     | 4      | 25251806     | 0.999085  |
| rs6842695  | C/T     | 4      | 25537628     | 0.998627  |
| rs2007586  | A/G     | 4      | 26244492     | 0.886041  |
| rs10517192 | C/G     | 4      | 29453118     | 0.998627  |
| rs2034371  | T/C     | 4      | 32852430     | 0.999542  |
| rs719776   | C/G     | 4      | 33509226     | 0.998627  |
| rs10049867 | C/T     | 4      | 36090235     | 0.998627  |
| rs1113837  | C/G     | 4      | 41438579     | 0.896568  |
| rs7695466  | C/G     | 4      | 52933205     | 0.994508  |
| rs1156180  | A/C     | 4      | 55100097     | 0.978032  |
| rs17081857 | A/G     | 4      | 55884258     | 0.997712  |
| rs4241633  | A/G     | 4      | 60999414     | 0.98032   |
| rs10032765 | C/T     | 4      | 63551250     | 0.996339  |
| rs1384720  | A/C     | 4      | 65104415     | 0.998627  |
| rs7663168  | G/T     | 4      | 67166380     | 0.998627  |
| rs7689609  | A/G     | 4      | 72448409     | 0.999542  |
| rs4694666  | C/T     | 4      | 75432877     | 0.999542  |
| rs7664889  | G/T     | 4      | 77444883     | 0.995881  |
| rs7669299  | A/G     | 4      | 78804323     | 0.998169  |
| rs7687681  | T/G     | 4      | 80241595     | 0.994966  |
| rs1712373  | C/T     | 4      | 82512488     | 0.999085  |
| rs9968403  | C/T     | 4      | 83805120     | 0.999542  |
| rs10030779 | C/T     | 4      | 84700743     | 0.993593  |
| rs2178603  | T/C     | 4      | 85447928     | 0.997712  |
| rs2725267  | C/T     | 4      | 89373354     | 1         |
| rs6814827  | G/T     | 4      | 91697846     | 1         |
| rs10003577 | G/C     | 4      | 95677257     | 0.999542  |
| rs6827097  | A/G     | 4      | 99614458     | 0.999085  |
| rs755961   | A/G     | 4      | 102557044    | 0.998627  |
| rs7662047  | A/G     | 4      | 103448908    | 0.984897  |
| rs7657799  | G/T     | 4      | 105733027    | 0.999085  |
| rs7440570  | G/C     | 4      | 110743640    | 0.999542  |
| rs2282787  | A/G     | 4      | 111288398    | 0.998169  |
| rs1147588  | A/G     | 4      | 112333504    | 0.901602  |
| rs12503758 | A/T     | 4      | 114206646    | 0.999085  |

Supplementary Table 6 Physical position and call rates for 1354 ancestry informative markers used in the admixture scan

| SNP        | Alleles | Chromo | Phy_Position | Call rate |
|------------|---------|--------|--------------|-----------|
| rs1525760  | C/T     | 4      | 117492984    | 0.997712  |
| rs11934975 | C/T     | 4      | 119658754    | 0.999542  |
| rs6534487  | T/C     | 4      | 126809579    | 0.999085  |
| rs1216400  | C/T     | 4      | 129869923    | 0.998169  |
| rs10016932 | A/G     | 4      | 131534512    | 0.995881  |
| rs7694118  | C/T     | 4      | 134426240    | 0.997254  |
| rs1451115  | A/C     | 4      | 137559494    | 0.998169  |
| rs13118868 | A/T     | 4      | 141171843    | 0.997712  |
| rs10016497 | A/G     | 4      | 141571827    | 0.999542  |
| rs1872861  | G/T     | 4      | 142113495    | 0.998627  |
| rs11100741 | C/G     | 4      | 143305151    | 1         |
| rs2635256  | T/G     | 4      | 149214558    | 0.999085  |
| rs10016143 | A/G     | 4      | 149973166    | 1         |
| rs7692206  | A/G     | 4      | 155464298    | 0.997712  |
| rs2220061  | C/T     | 4      | 156896899    | 0.994966  |
| rs7683995  | A/T     | 4      | 157353838    | 0.995423  |
| rs11736805 | T/C     | 4      | 159841009    | 0.960641  |
| rs1434621  | C/G     | 4      | 163007260    | 0.999542  |
| rs6829588  | A/C     | 4      | 165579576    | 0.999542  |
| rs1530044  | A/T     | 4      | 166785016    | 0.999085  |
| rs2877558  | A/G     | 4      | 172117946    | 0.999542  |
| rs17056945 | A/T     | 4      | 172790419    | 1         |
| rs2217849  | A/C     | 4      | 175376754    | 0.997712  |
| rs13107001 | A/G     | 4      | 176774736    | 0.998627  |
| rs13146622 | C/T     | 4      | 177202513    | 0.996339  |
| rs2574904  | T/C     | 4      | 178219717    | 0.997712  |
| rs1377859  | T/C     | 4      | 179124236    | 0.998627  |
| rs2545258  | A/G     | 4      | 182062741    | 0.999542  |
| rs10011443 | T/C     | 4      | 183319987    | 0.998627  |
| rs1877289  | C/G     | 4      | 184564564    | 0.998627  |
| rs4861584  | C/T     | 4      | 185240270    | 0.998169  |
| rs983763   | A/C     | 4      | 186356869    | 0.998627  |
| rs7691485  | T/G     | 4      | 186823625    | 0.999542  |
| rs11736748 | A/G     | 4      | 188417323    | 0.998169  |
| rs954456   | C/T     | 4      | 188841258    | 0.997712  |
| rs6419955  | C/T     | 4      | 189077709    | 0.999085  |
| rs2272596  | C/T     | 4      | 191237140    | 0.995423  |
| rs4975732  | A/T     | 5      | 1879075      | 0.998627  |
| rs378257   | A/G     | 5      | 2571738      | 0.999085  |
| rs1565807  | A/G     | 5      | 3018167      | 0.999085  |
| rs585638   | G/T     | 5      | 3993916      | 0.998627  |
| rs11747238 | A/G     | 5      | 4831369      | 0.998169  |



Supplementary Table 6 Physical position and call rates for 1354 ancestry informative markers used in the admixture scan

| SNP        | Alleles | Chromo | Phy_Position | Call rate |
|------------|---------|--------|--------------|-----------|
| rs4143541  | C/T     | 5      | 5778162      | 0.999085  |
| rs3733778  | A/G     | 5      | 6544532      | 0.995881  |
| rs170936   | A/G     | 5      | 8211804      | 0.998169  |
| rs6892396  | A/G     | 5      | 10386138     | 0.999085  |
| rs230066   | A/G     | 5      | 13576834     | 1         |
| rs6887662  | A/T     | 5      | 14472552     | 0.998169  |
| rs871722   | C/T     | 5      | 17490494     | 0.998169  |
| rs12109816 | C/T     | 5      | 19786897     | 0.998169  |
| rs13189619 | A/G     | 5      | 21763249     | 0.998169  |
| rs16893878 | C/G     | 5      | 24768486     | 0.999542  |
| rs7727623  | C/T     | 5      | 28248480     | 0.996339  |
| rs7735863  | T/C     | 5      | 31522297     | 0.998627  |
| rs7714189  | C/T     | 5      | 31786103     | 0.995881  |
| rs35397    | G/T     | 5      | 33986873     | 0.999085  |
| rs40030    | A/G     | 5      | 36212631     | 0.999542  |
| rs930072   | C/T     | 5      | 36701828     | 0.998169  |
| rs4869577  | C/G     | 5      | 38254937     | 0.997254  |
| rs12657366 | C/T     | 5      | 39207788     | 0.998169  |
| rs6883840  | A/G     | 5      | 40322167     | 0.999085  |
| rs6881896  | T/C     | 5      | 55508312     | 0.968421  |
| rs6883485  | A/T     | 5      | 57015013     | 0.999542  |
| rs16889892 | C/T     | 5      | 58814133     | 0.993135  |
| rs10059859 | C/T     | 5      | 59267064     | 0.998627  |
| rs7712760  | A/G     | 5      | 64075218     | 0.999542  |
| rs1428473  | A/G     | 5      | 66589316     | 0.996339  |
| rs33347    | C/T     | 5      | 68010277     | 0.999542  |
| rs874973   | A/G     | 5      | 72773651     | 0.998627  |
| rs13357495 | A/G     | 5      | 73121422     | 0.998169  |
| rs4296785  | C/T     | 5      | 75746539     | 0.999085  |
| rs7712675  | A/T     | 5      | 76174323     | 0.996339  |
| rs4455545  | G/T     | 5      | 77675361     | 0.979863  |
| rs16877749 | A/C     | 5      | 79706997     | 0.999085  |
| rs6452419  | A/C     | 5      | 80907158     | 0.997712  |
| rs6895226  | C/T     | 5      | 82150859     | 0.993593  |
| rs2964881  | A/T     | 5      | 85709177     | 0.997712  |
| rs301719   | C/G     | 5      | 88268671     | 0.999542  |
| rs1983366  | C/G     | 5      | 90133069     | 0.998627  |
| rs10474347 | A/G     | 5      | 90602254     | 0.998169  |
| rs6556871  | C/T     | 5      | 94804531     | 0.998627  |
| rs4703161  | T/G     | 5      | 100970354    | 0.997712  |
| rs294152   | T/C     | 5      | 104486852    | 0.998627  |
| rs4631225  | A/G     | 5      | 108840383    | 0.938673  |

Supplementary Table 6 Physical position and call rates for 1354 ancestry informative markers used in the admixture scan

| SNP        | Alleles | Chromo | Phy_Position | Call rate |
|------------|---------|--------|--------------|-----------|
| rs313617   | A/G     | 5      | 109845448    | 0.999542  |
| rs2416309  | A/T     | 5      | 112600473    | 0.997712  |
| rs1382342  | A/C     | 5      | 115589027    | 0.998627  |
| rs7445113  | C/G     | 5      | 117067817    | 0.999542  |
| rs11951498 | C/T     | 5      | 119471746    | 0.995881  |
| rs10041728 | A/G     | 5      | 121164880    | 0.999542  |
| rs718359   | C/T     | 5      | 123736936    | 0.987643  |
| rs1478446  | C/T     | 5      | 127599798    | 1         |
| rs30533    | C/T     | 5      | 132122873    | 0.986728  |
| CV25637683 | A/T     | 5      | 132584331    | 0.998169  |
| rs261532   | G/T     | 5      | 138929546    | 1         |
| rs33957    | A/C     | 5      | 141908017    | 0.999542  |
| rs17099475 | C/T     | 5      | 142138783    | 0.998169  |
| rs6883434  | A/G     | 5      | 145020090    | 0.982609  |
| rs4513684  | A/C     | 5      | 147632278    | 0.998627  |
| rs4705411  | C/T     | 5      | 149411218    | 0.998627  |
| rs6869603  | C/T     | 5      | 150123042    | 0.972082  |
| rs1462110  | C/G     | 5      | 152632939    | 0.998627  |
| rs4478303  | A/G     | 5      | 155417547    | 0.989474  |
| rs17057017 | C/T     | 5      | 159062695    | 0.995881  |
| rs4551093  | C/T     | 5      | 162585405    | 0.999542  |
| rs1909593  | T/C     | 5      | 165556477    | 0.998627  |
| rs12522225 | A/C     | 5      | 167205850    | 0.999085  |
| rs155239   | C/T     | 5      | 169098506    | 0.998169  |
| rs1035414  | A/G     | 5      | 169858373    | 0.997712  |
| rs1107776  | A/C     | 5      | 171955921    | 0.997254  |
| rs4868232  | C/G     | 5      | 172332844    | 0.999542  |
| rs12514977 | C/T     | 5      | 173668113    | 0.941419  |
| rs7729084  | A/C     | 5      | 174314186    | 0.998627  |
| rs6556222  | A/T     | 5      | 175110027    | 0.984897  |
| rs6422347  | C/T     | 5      | 177795689    | 0.996796  |
| rs11951895 | C/T     | 5      | 178606521    | 0.992677  |
| rs670902   | C/T     | 5      | 180147459    | 0.998169  |
| rs10313    | A/G     | 5      | 180615011    | 0.999542  |
| rs736864   | G/T     | 6      | 131221       | 0.999542  |
| rs6597398  | A/G     | 6      | 925237       | 0.969336  |
| rs7775219  | C/T     | 6      | 3222297      | 0.995423  |
| rs2326248  | A/G     | 6      | 3632313      | 0.999542  |
| rs1265328  | A/G     | 6      | 4713690      | 0.999542  |
| rs2224391  | T/G     | 6      | 5205935      | 0.989016  |
| rs1323200  | C/T     | 6      | 5814353      | 0.998627  |
| rs3024354  | G/T     | 6      | 6237429      | 0.933638  |

Supplementary Table 6 Physical position and call rates for 1354 ancestry informative markers used in the admixture scan

| SNP        | Alleles | Chromo | Phy_Position | Call rate |
|------------|---------|--------|--------------|-----------|
| rs4276549  | A/G     | 6      | 8825098      | 0.997712  |
| rs6456591  | T/C     | 6      | 10751821     | 0.999542  |
| rs209814   | C/G     | 6      | 12059847     | 0.998169  |
| rs2504914  | A/G     | 6      | 12715027     | 0.989931  |
| rs579240   | A/G     | 6      | 13467310     | 0.996796  |
| rs857455   | T/C     | 6      | 14788086     | 0.999085  |
| rs7770341  | T/G     | 6      | 16276393     | 0.996796  |
| rs7760407  | A/C     | 6      | 20550287     | 0.950114  |
| rs303016   | C/T     | 6      | 25247443     | 0.984897  |
| rs11966360 | A/G     | 6      | 26424961     | 0.897483  |
| rs11962335 | A/C     | 6      | 35549145     | 0.997712  |
| rs2181243  | C/T     | 6      | 39330978     | 0.998169  |
| rs619572   | A/G     | 6      | 42425545     | 0.998627  |
| rs1334601  | C/T     | 6      | 43761383     | 0.999542  |
| rs7757763  | A/C     | 6      | 44093820     | 0.999085  |
| rs927485   | A/G     | 6      | 44646117     | 0.998627  |
| rs10948308 | C/G     | 6      | 46857996     | 0.997712  |
| rs243123   | C/T     | 6      | 48741548     | 1         |
| rs6577     | G/T     | 6      | 52723374     | 0.997712  |
| rs7766458  | A/C     | 6      | 54248087     | 0.999085  |
| rs9475487  | A/G     | 6      | 55933810     | 0.993135  |
| rs9444618  | C/T     | 6      | 64938782     | 0.998169  |
| rs2639291  | C/T     | 6      | 71238734     | 0.998627  |
| rs1619936  | C/T     | 6      | 71655266     | 0.997712  |
| rs1573057  | C/G     | 6      | 73915151     | 0.999542  |
| rs1341567  | A/C     | 6      | 76684896     | 0.998627  |
| rs613998   | A/G     | 6      | 81256204     | 0.974371  |
| rs1325471  | A/G     | 6      | 84624394     | 0.989474  |
| rs2179770  | C/T     | 6      | 86888966     | 0.999542  |
| rs1923416  | C/T     | 6      | 89348510     | 0.994508  |
| rs11963862 | C/T     | 6      | 91828068     | 0.979863  |
| rs222541   | C/G     | 6      | 95287884     | 0.979863  |
| rs197870   | A/G     | 6      | 95613585     | 0.995881  |
| rs211158   | C/G     | 6      | 97129659     | 0.999542  |
| rs7752055  | C/T     | 6      | 106067405    | 0.998169  |
| rs11966261 | C/T     | 6      | 106409967    | 0.999085  |
| rs4946888  | A/T     | 6      | 108437987    | 0.998627  |
| rs9386887  | C/T     | 6      | 110754613    | 0.996339  |
| rs706913   | C/T     | 6      | 112160666    | 0.979863  |
| rs1204797  | C/T     | 6      | 116648240    | 0.996339  |
| rs443149   | A/G     | 6      | 121456469    | 0.999085  |
| rs9320960  | A/G     | 6      | 124139020    | 0.998627  |

| Supplementary Table 6 Physical position and call rates for 1354 ancestry informative markers used in the admixture scan |         |        |              |           |
|-------------------------------------------------------------------------------------------------------------------------|---------|--------|--------------|-----------|
| SNP                                                                                                                     | Alleles | Chromo | Phy_Position | Call rate |
| rs1015247                                                                                                               | A/C     | 6      | 124662213    | 0.997254  |
| rs9491384                                                                                                               | C/T     | 6      | 125673258    | 0.999085  |
| rs774290                                                                                                                | C/T     | 6      | 129086919    | 1         |
| rs2286453                                                                                                               | A/C     | 6      | 132039491    | 0.998627  |
| rs9388989                                                                                                               | A/G     | 6      | 132739275    | 0.999085  |
| rs4507607                                                                                                               | A/G     | 6      | 134451492    | 0.981693  |
| rs1480642                                                                                                               | C/T     | 6      | 136541221    | 0.997712  |
| rs10872502                                                                                                              | A/G     | 6      | 139443167    | 0.996339  |
| rs4489173                                                                                                               | C/T     | 6      | 143457111    | 0.996796  |
| rs4896767                                                                                                               | A/G     | 6      | 145352783    | 0.999085  |
| rs362949                                                                                                                | C/T     | 6      | 146694047    | 0.997712  |
| rs11155751                                                                                                              | A/G     | 6      | 151187493    | 0.999085  |
| rs505358                                                                                                                | A/G     | 6      | 151419962    | 0.999542  |
| rs9397067                                                                                                               | A/C     | 6      | 152012965    | 0.999542  |
| rs4870209                                                                                                               | A/C     | 6      | 154047709    | 0.974828  |
| rs1017643                                                                                                               | A/G     | 6      | 156886246    | 0.999542  |
| rs2803358                                                                                                               | A/G     | 6      | 158178337    | 1         |
| rs2209247                                                                                                               | A/G     | 6      | 161853401    | 0.995881  |
| rs6455767                                                                                                               | C/T     | 6      | 162118746    | 1         |
| rs9458710                                                                                                               | C/G     | 6      | 163392697    | 0.994966  |
| rs686406                                                                                                                | T/C     | 6      | 165900564    | 0.999085  |
| rs2345674                                                                                                               | A/G     | 6      | 167238537    | 0.997254  |
| rs3055                                                                                                                  | C/T     | 6      | 169884144    | 1         |
| rs745285                                                                                                                | A/C     | 6      | 170455957    | 0.994966  |
| rs6948971                                                                                                               | A/G     | 7      | 1627504      | 0.994966  |
| rs6977305                                                                                                               | C/G     | 7      | 3716791      | 0.954233  |
| rs7807841                                                                                                               | T/C     | 7      | 6025698      | 1         |
| rs1294631                                                                                                               | A/T     | 7      | 7196637      | 0.998627  |
| rs3823831                                                                                                               | C/T     | 7      | 8013677      | 0.998627  |
| rs2882524                                                                                                               | A/G     | 7      | 9289163      | 0.996796  |
| rs7798735                                                                                                               | C/T     | 7      | 9919817      | 0.998627  |
| rs6967267                                                                                                               | A/G     | 7      | 12458241     | 0.999542  |
| rs11771343                                                                                                              | C/T     | 7      | 13048079     | 0.998627  |
| rs1525091                                                                                                               | C/T     | 7      | 14565903     | 0.997254  |
| rs7810554                                                                                                               | A/T     | 7      | 14914430     | 0.996796  |
| rs37423                                                                                                                 | A/G     | 7      | 15561481     | 0.998169  |
| rs4383884                                                                                                               | A/G     | 7      | 18882944     | 0.999542  |
| rs7783252                                                                                                               | G/T     | 7      | 19741355     | 0.99222   |
| rs2965404                                                                                                               | C/T     | 7      | 21522742     | 0.999542  |
| rs187985                                                                                                                | A/G     | 7      | 23199472     | 0.995881  |
| rs10480042                                                                                                              | T/A     | 7      | 25578687     | 0.998169  |
| rs2391223                                                                                                               | T/C     | 7      | 25895181     | 0.997254  |

Supplementary Table 6 Physical position and call rates for 1354 ancestry informative markers used in the admixture scan

| SNP        | Alleles | Chromo | Phy_Position | Call rate |
|------------|---------|--------|--------------|-----------|
| rs6461999  | A/C     | 7      | 27054544     | 0.998169  |
| rs7776819  | A/G     | 7      | 28904002     | 0.996796  |
| rs2107550  | A/G     | 7      | 30691603     | 0.999542  |
| rs2267739  | C/G     | 7      | 30910137     | 1         |
| rs2598392  | A/G     | 7      | 33394139     | 0.998169  |
| rs7810092  | A/G     | 7      | 34169870     | 0.984897  |
| rs17171649 | A/T     | 7      | 39871715     | 0.990389  |
| rs37268    | C/T     | 7      | 41112220     | 0.998627  |
| rs10264353 | T/C     | 7      | 43094317     | 0.999085  |
| rs260368   | A/C     | 7      | 46236582     | 0.998627  |
| rs12539620 | A/G     | 7      | 48987183     | 0.997254  |
| rs10270964 | C/T     | 7      | 50663335     | 0.997712  |
| rs6592995  | C/T     | 7      | 52225975     | 0.997254  |
| rs10225118 | A/C     | 7      | 54798351     | 0.997712  |
| rs17520733 | A/G     | 7      | 70094440     | 0.999542  |
| rs844684   | A/C     | 7      | 70939648     | 0.999085  |
| rs2110871  | T/C     | 7      | 77725199     | 0.999085  |
| rs35661326 | C/T     | 7      | 78354894     | 0.99405   |
| rs13237436 | A/G     | 7      | 79520469     | 0.999542  |
| rs1322849  | C/T     | 7      | 81726190     | 0.993135  |
| rs7802588  | T/C     | 7      | 83132586     | 0.998627  |
| rs7807771  | T/C     | 7      | 84793614     | 0.998627  |
| rs10488004 | A/G     | 7      | 90402887     | 0.999542  |
| rs9784907  | A/G     | 7      | 92591107     | 0.994508  |
| rs6465387  | C/G     | 7      | 92798711     | 0.994508  |
| rs2395018  | C/T     | 7      | 98358537     | 0.99405   |
| rs883403   | A/G     | 7      | 98692629     | 0.995881  |
| rs6466115  | T/C     | 7      | 105705623    | 0.998169  |
| rs17154865 | C/T     | 7      | 107290240    | 0.999085  |
| rs1525200  | C/T     | 7      | 108053867    | 0.997254  |
| rs10275038 | A/G     | 7      | 111080977    | 0.998169  |
| rs12533049 | C/T     | 7      | 113996284    | 0.997254  |
| rs10262976 | A/C     | 7      | 117294188    | 0.944622  |
| rs2141360  | A/G     | 7      | 120654124    | 0.997254  |
| rs683493   | A/G     | 7      | 125399252    | 0.995423  |
| rs350650   | C/T     | 7      | 130174978    | 0.997712  |
| rs4607549  | C/G     | 7      | 130791604    | 0.999085  |
| rs1450881  | C/T     | 7      | 131289800    | 0.977117  |
| rs1433391  | C/G     | 7      | 131558772    | 0.999085  |
| rs4728417  | A/C     | 7      | 136597185    | 0.999542  |
| rs7796821  | A/G     | 7      | 136972046    | 0.999542  |
| rs10954631 | A/G     | 7      | 137996881    | 0.996339  |

Supplementary Table 6 Physical position and call rates for 1354 ancestry informative markers used in the admixture scan

| SNP        | Alleles | Chromo | Phy_Position | Call rate |
|------------|---------|--------|--------------|-----------|
| rs2249070  | A/C     | 7      | 138329600    | 0.998169  |
| rs1985729  | A/G     | 7      | 141147989    | 0.999085  |
| rs802566   | G/C     | 7      | 145393531    | 0.999085  |
| rs344454   | T/C     | 7      | 145839082    | 0.99405   |
| rs975018   | C/G     | 7      | 148941967    | 0.996339  |
| rs11765596 | A/G     | 7      | 150681740    | 1         |
| rs11763144 | C/G     | 7      | 150921544    | 0.997254  |
| rs6464211  | C/T     | 7      | 151311501    | 0.999542  |
| rs520556   | T/C     | 7      | 152141044    | 0.999085  |
| rs10952443 | C/G     | 7      | 152818126    | 0.979863  |
| rs1861141  | A/G     | 7      | 153498093    | 0.997254  |
| rs4716933  | A/G     | 7      | 155223663    | 0.999085  |
| rs1922084  | C/T     | 7      | 155542036    | 0.977574  |
| rs1182381  | C/T     | 7      | 156542949    | 0.997254  |
| rs11995302 | A/G     | 8      | 313502       | 0.996796  |
| rs882119   | A/G     | 8      | 1455875      | 0.994966  |
| rs1455640  | A/G     | 8      | 2306617      | 0.998169  |
| rs4602918  | C/T     | 8      | 2610476      | 0.998627  |
| rs11136580 | C/G     | 8      | 2970182      | 0.998627  |
| rs11136757 | A/G     | 8      | 4447323      | 0.974828  |
| rs11990769 | A/G     | 8      | 5041230      | 0.998627  |
| rs1057187  | T/G     | 8      | 6250491      | 0.945995  |
| rs12544727 | A/G     | 8      | 10287569     | 0.997254  |
| rs6601548  | C/T     | 8      | 10925506     | 0.991304  |
| rs2948375  | G/T     | 8      | 12791034     | 0.996796  |
| rs1442534  | A/C     | 8      | 13018978     | 0.994508  |
| rs1480144  | A/C     | 8      | 16181956     | 0.997712  |
| rs1523643  | A/G     | 8      | 16833606     | 0.997712  |
| rs10503671 | C/G     | 8      | 20031453     | 0.995423  |
| rs10098971 | A/C     | 8      | 21364794     | 0.995423  |
| rs6558052  | C/T     | 8      | 22329632     | 0.967963  |
| rs926105   | T/C     | 8      | 24776396     | 0.999085  |
| rs1485747  | C/T     | 8      | 25903790     | 0.982609  |
| rs4732619  | A/G     | 8      | 27933188     | 0.998627  |
| rs4732942  | C/G     | 8      | 29353437     | 0.999542  |
| rs2938203  | C/T     | 8      | 30250474     | 0.999085  |
| rs1462906  | C/T     | 8      | 32016134     | 1         |
| rs4237080  | T/C     | 8      | 34900051     | 0.990847  |
| rs934649   | A/G     | 8      | 35837839     | 0.998627  |
| rs10958604 | G/T     | 8      | 40132968     | 0.999542  |
| rs2722459  | A/C     | 8      | 40525616     | 0.999085  |
| rs3763547  | A/G     | 8      | 52974896     | 0.998169  |

Supplementary Table 6 Physical position and call rates for 1354 ancestry informative markers used in the admixture scan

| SNP        | Alleles | Chromo | Phy_Position | Call rate |
|------------|---------|--------|--------------|-----------|
| rs7006934  | A/G     | 8      | 54812636     | 0.999542  |
| rs13439780 | A/G     | 8      | 56506740     | 0.999542  |
| rs10093645 | C/T     | 8      | 59141359     | 0.994966  |
| rs9792192  | C/T     | 8      | 60148346     | 0.965217  |
| rs1866694  | A/C     | 8      | 62335222     | 0.999542  |
| rs10957516 | A/G     | 8      | 71281605     | 0.999085  |
| rs11786868 | C/G     | 8      | 77816500     | 0.998627  |
| rs10957952 | C/T     | 8      | 81104552     | 0.997254  |
| rs999450   | C/T     | 8      | 82058891     | 0.997254  |
| rs1882852  | A/T     | 8      | 91363305     | 0.998627  |
| rs2978133  | A/G     | 8      | 95164339     | 0.998627  |
| rs3133745  | A/G     | 8      | 96603982     | 0.998169  |
| rs11996075 | C/T     | 8      | 98979463     | 0.998627  |
| rs6994682  | C/T     | 8      | 101490974    | 0.997712  |
| rs7824468  | T/C     | 8      | 102094827    | 0.999542  |
| rs2669425  | C/T     | 8      | 105464759    | 0.998627  |
| rs11986537 | C/T     | 8      | 106949825    | 0.999542  |
| rs17840659 | T/C     | 8      | 111488705    | 0.999085  |
| rs9297546  | T/C     | 8      | 116891444    | 0.999085  |
| rs17297109 | G/C     | 8      | 122638614    | 0.997712  |
| rs13251094 | G/T     | 8      | 126594178    | 0.982609  |
| rs7836147  | C/T     | 8      | 126834504    | 0.998169  |
| rs780321   | T/C     | 8      | 127152877    | 0.997712  |
| rs12543473 | G/T     | 8      | 127850622    | 0.998169  |
| rs4427136  | A/G     | 8      | 128949021    | 0.998627  |
| rs4367565  | A/G     | 8      | 131607137    | 0.999542  |
| rs1514626  | T/C     | 8      | 132834923    | 0.998627  |
| rs7831261  | A/C     | 8      | 135416154    | 0.999085  |
| rs4471082  | T/G     | 8      | 138204459    | 0.992677  |
| rs7017031  | A/G     | 8      | 139619035    | 0.998169  |
| rs28409472 | C/T     | 8      | 140914343    | 0.995881  |
| rs7011715  | A/G     | 8      | 142488436    | 0.987185  |
| rs6558387  | A/C     | 8      | 144910578    | 0.991304  |
| rs11248217 | A/G     | 8      | 146139664    | 0.999085  |
| rs16932430 | A/C     | 9      | 334332       | 0.997254  |
| rs10809101 | T/C     | 9      | 1048914      | 0.999542  |
| rs10964101 | C/T     | 9      | 1933156      | 0.985355  |
| rs7865808  | A/G     | 9      | 2903620      | 0.998169  |
| rs12378782 | C/T     | 9      | 4321717      | 0.983524  |
| rs913258   | C/G     | 9      | 4867246      | 0.99405   |
| rs7043596  | C/T     | 9      | 5699530      | 0.999542  |
| rs1500318  | C/T     | 9      | 8351445      | 0.999085  |

Supplementary Table 6 Physical position and call rates for 1354 ancestry informative markers used in the admixture scan

| SNP        | Alleles | Chromo | Phy_Position | Call rate |
|------------|---------|--------|--------------|-----------|
| rs449090   | T/C     | 9      | 10053345     | 0.998627  |
| rs10491949 | A/T     | 9      | 11503866     | 0.995881  |
| rs1331675  | A/G     | 9      | 13167389     | 0.999542  |
| rs10810130 | A/T     | 9      | 14294973     | 0.999085  |
| rs4741453  | A/G     | 9      | 15075778     | 0.995881  |
| rs10756782 | A/C     | 9      | 16690514     | 1         |
| rs2593404  | C/T     | 9      | 17549393     | 0.999085  |
| rs10811249 | A/G     | 9      | 19822327     | 0.996796  |
| rs2301550  | A/G     | 9      | 20344796     | 0.994508  |
| rs4977826  | C/T     | 9      | 23117562     | 0.999085  |
| rs7873820  | A/C     | 9      | 24873179     | 0.998627  |
| rs1412387  | T/C     | 9      | 25568182     | 0.997712  |
| rs439314   | C/T     | 9      | 26369840     | 0.999542  |
| rs4878586  | C/T     | 9      | 27800414     | 0.999085  |
| rs10757957 | A/G     | 9      | 30466239     | 1         |
| rs4879592  | T/C     | 9      | 32687114     | 0.998627  |
| rs3849903  | A/G     | 9      | 33308588     | 1         |
| rs10758409 | C/T     | 9      | 36859256     | 0.997712  |
| rs1887455  | A/C     | 9      | 37478725     | 0.998627  |
| rs1331473  | T/C     | 9      | 68444280     | 0.998627  |
| rs10780551 | C/T     | 9      | 69508257     | 0.996796  |
| rs1935338  | C/T     | 9      | 71268720     | 0.995881  |
| rs981197   | T/G     | 9      | 73634385     | 0.998169  |
| rs894823   | C/T     | 9      | 77308083     | 1         |
| rs6559415  | T/C     | 9      | 78673409     | 0.999085  |
| rs951577   | A/G     | 9      | 82269663     | 1         |
| rs7859549  | A/G     | 9      | 85916539     | 0.998627  |
| rs927524   | A/G     | 9      | 87122154     | 0.998627  |
| rs17054173 | T/A     | 9      | 88349153     | 0.999085  |
| rs774227   | C/T     | 9      | 91273496     | 0.930892  |
| rs10992623 | C/T     | 9      | 92910203     | 0.999085  |
| rs6477733  | G/T     | 9      | 96704618     | 0.996339  |
| rs7853312  | T/A     | 9      | 98082189     | 0.998627  |
| rs1932158  | A/G     | 9      | 102089023    | 0.997712  |
| rs942136   | A/G     | 9      | 108165951    | 0.998169  |
| rs7854368  | A/G     | 9      | 111887196    | 0.997254  |
| rs10759715 | C/T     | 9      | 114356849    | 0.999542  |
| rs10739459 | C/T     | 9      | 115949437    | 0.994508  |
| rs4144636  | G/T     | 9      | 116842261    | 0.998169  |
| rs10739560 | C/T     | 9      | 120110398    | 0.999542  |
| rs2488597  | A/G     | 9      | 123071627    | 0.998627  |
| rs3814134  | A/G     | 9      | 124347243    | 0.984439  |



Supplementary Table 6 Physical position and call rates for 1354 ancestry informative markers used in the admixture scan

| SNP        | Alleles | Chromo | Phy_Position | Call rate |
|------------|---------|--------|--------------|-----------|
| rs518116   | A/G     | 9      | 126795290    | 1         |
| rs590086   | A/G     | 9      | 130373213    | 0.995423  |
| rs1009249  | C/T     | 9      | 130943617    | 0.984897  |
| rs7041015  | A/G     | 9      | 132323407    | 0.998627  |
| rs2002962  | C/T     | 9      | 133131169    | 0.996339  |
| rs6537934  | A/G     | 9      | 134737223    | 0.996796  |
| rs5029224  | T/C     | 9      | 137999636    | 0.998169  |
| rs7860423  | A/G     | 9      | 138231384    | 0.996796  |
| rs816627   | A/G     | 10     | 608409       | 0.999085  |
| rs10794743 | A/C     | 10     | 1401286      | 0.996339  |
| rs10751868 | G/T     | 10     | 2339357      | 0.999085  |
| rs4881055  | A/C     | 10     | 3043366      | 0.996339  |
| rs2025163  | C/G     | 10     | 4289104      | 0.976201  |
| rs1341926  | A/G     | 10     | 6334450      | 0.993135  |
| rs2804126  | T/C     | 10     | 7000618      | 0.997712  |
| rs1149908  | A/C     | 10     | 8193828      | 0.998627  |
| rs1414090  | T/C     | 10     | 9430541      | 0.997712  |
| rs201113   | C/T     | 10     | 11088270     | 0.985355  |
| rs4623785  | C/G     | 10     | 12784342     | 0.999085  |
| rs2039014  | C/T     | 10     | 14855085     | 1         |
| rs1326207  | A/G     | 10     | 15206911     | 0.99405   |
| rs12247963 | A/G     | 10     | 15875255     | 0.998627  |
| rs12262718 | A/G     | 10     | 17383712     | 0.999085  |
| rs4406722  | G/C     | 10     | 19941019     | 0.999542  |
| rs7079790  | A/G     | 10     | 21336969     | 0.989931  |
| rs6482313  | C/G     | 10     | 23984216     | 1         |
| rs3808907  | C/T     | 10     | 25282928     | 0.998627  |
| rs796829   | G/C     | 10     | 29153703     | 0.999542  |
| rs7919137  | T/G     | 10     | 31665395     | 1         |
| rs2776937  | A/G     | 10     | 33646195     | 0.998169  |
| rs593992   | C/T     | 10     | 34576055     | 0.999085  |
| rs10764116 | C/T     | 10     | 37279571     | 0.998169  |
| rs10900107 | C/T     | 10     | 44563177     | 0.996339  |
| rs11239367 | A/T     | 10     | 44967018     | 0.996796  |
| rs11101394 | C/T     | 10     | 49475222     | 0.998627  |
| rs10761587 | C/T     | 10     | 52319199     | 0.999085  |
| rs1911414  | G/T     | 10     | 55427222     | 0.996796  |
| rs1733742  | A/C     | 10     | 56518858     | 0.998627  |
| rs12268117 | A/G     | 10     | 57964665     | 0.988558  |
| rs224136   | C/T     | 10     | 64140681     | 1         |
| rs10761835 | A/G     | 10     | 65562077     | 0.999542  |
| rs1904630  | A/G     | 10     | 68768634     | 0.997712  |

Supplementary Table 6 Physical position and call rates for 1354 ancestry informative markers used in the admixture scan

| SNP        | Alleles | Chromo | Phy_Position | Call rate |
|------------|---------|--------|--------------|-----------|
| rs10762276 | C/T     | 10     | 70722475     | 0.998169  |
| rs2394931  | A/G     | 10     | 74336071     | 0.996339  |
| rs7896396  | T/C     | 10     | 77184781     | 0.998627  |
| rs2913116  | C/T     | 10     | 79698947     | 0.998169  |
| rs570677   | C/T     | 10     | 80292362     | 1         |
| rs2207657  | C/T     | 10     | 83592540     | 0.999085  |
| rs7069367  | C/T     | 10     | 84064956     | 0.998627  |
| rs10788307 | A/T     | 10     | 85776789     | 1         |
| rs736141   | C/T     | 10     | 86006470     | 0.993135  |
| rs7895530  | C/T     | 10     | 91577329     | 0.998627  |
| rs6583810  | A/G     | 10     | 94106213     | 0.999085  |
| rs701851   | A/G     | 10     | 95167692     | 0.999085  |
| rs4532970  | A/T     | 10     | 98623932     | 0.999542  |
| rs10748736 | T/C     | 10     | 100267789    | 1         |
| rs670283   | T/C     | 10     | 105917100    | 0.994966  |
| rs10786930 | A/G     | 10     | 108001243    | 0.988558  |
| rs11193154 | T/C     | 10     | 108744739    | 0.995423  |
| rs2076974  | C/T     | 10     | 111810301    | 1         |
| rs11195536 | T/C     | 10     | 113101768    | 0.990847  |
| rs7908735  | A/G     | 10     | 113962396    | 0.998627  |
| rs11197469 | C/T     | 10     | 117639876    | 0.996339  |
| rs992528   | A/T     | 10     | 118152572    | 0.999542  |
| rs7908387  | T/C     | 10     | 120818959    | 0.999085  |
| rs10749372 | C/T     | 10     | 122131177    | 0.994966  |
| rs11200479 | C/G     | 10     | 123957845    | 0.998169  |
| rs6599662  | A/G     | 10     | 124932796    | 0.998627  |
| rs10764784 | A/T     | 10     | 130206989    | 0.998627  |
| rs1762430  | C/T     | 10     | 131163189    | 0.995423  |
| rs7100028  | T/C     | 10     | 131538677    | 0.995423  |
| rs4751330  | C/G     | 10     | 132835434    | 0.988101  |
| rs9418990  | A/G     | 10     | 135226847    | 0.998627  |
| rs7935419  | T/C     | 11     | 668973       | 0.997254  |
| rs800336   | A/G     | 11     | 2429707      | 0.994508  |
| rs10768634 | C/T     | 11     | 5149986      | 0.999542  |
| rs7947368  | A/G     | 11     | 6543804      | 0.998169  |
| rs1384508  | T/A     | 11     | 7705050      | 1         |
| rs10765838 | A/C     | 11     | 11326144     | 0.999085  |
| rs2403595  | A/G     | 11     | 12341885     | 0.998627  |
| rs6486270  | C/T     | 11     | 15927515     | 1         |
| rs4148636  | C/T     | 11     | 17383939     | 0.996796  |
| rs10833134 | T/C     | 11     | 19584103     | 0.998169  |
| rs1377740  | A/G     | 11     | 21169866     | 0.995423  |

Supplementary Table 6 Physical position and call rates for 1354 ancestry informative markers used in the admixture scan

| SNP        | Alleles | Chromo | Phy_Position | Call rate |
|------------|---------|--------|--------------|-----------|
| rs4378393  | A/G     | 11     | 21560867     | 0.998627  |
| rs1607559  | C/G     | 11     | 23642182     | 0.999085  |
| rs1561937  | A/G     | 11     | 25541756     | 0.998169  |
| rs12807847 | A/G     | 11     | 26699252     | 0.997254  |
| rs549272   | A/C     | 11     | 30419686     | 0.998627  |
| rs598264   | T/C     | 11     | 30751301     | 0.999085  |
| rs2553779  | A/G     | 11     | 35033124     | 0.998627  |
| rs10768140 | A/C     | 11     | 35467483     | 0.999542  |
| rs1030774  | A/G     | 11     | 38454177     | 0.999085  |
| rs1031763  | A/G     | 11     | 39886885     | 0.999542  |
| rs4631865  | T/G     | 11     | 40810971     | 0.996796  |
| rs10837800 | A/G     | 11     | 42241041     | 0.999542  |
| rs4752805  | A/G     | 11     | 47974931     | 0.999085  |
| rs2071168  | C/G     | 11     | 61063505     | 0.996796  |
| rs680273   | C/G     | 11     | 64296211     | 1         |
| rs10750836 | C/T     | 11     | 68572099     | 0.998169  |
| rs10793379 | A/G     | 11     | 70408796     | 0.998169  |
| rs7111814  | A/G     | 11     | 72613473     | 0.982609  |
| rs3740767  | A/G     | 11     | 76379254     | 0.996339  |
| rs3740677  | A/C     | 11     | 77605684     | 0.999542  |
| rs603295   | A/T     | 11     | 78308496     | 0.998627  |
| rs12289502 | A/C     | 11     | 80077061     | 0.999542  |
| rs6592183  | A/G     | 11     | 83841203     | 0.998169  |
| rs10792837 | A/G     | 11     | 85583363     | 0.997712  |
| rs585555   | A/C     | 11     | 94053391     | 0.999085  |
| rs1150349  | A/G     | 11     | 95178426     | 0.997712  |
| rs7125582  | A/G     | 11     | 96053431     | 0.996796  |
| rs1452673  | A/C     | 11     | 96757835     | 0.999085  |
| rs1442449  | C/T     | 11     | 99671000     | 0.993135  |
| rs527709   | A/G     | 11     | 105756724    | 0.994966  |
| rs647756   | A/G     | 11     | 107040968    | 0.999542  |
| rs566552   | A/G     | 11     | 108726089    | 0.999085  |
| rs4622301  | A/C     | 11     | 110301295    | 1         |
| rs6589360  | A/T     | 11     | 112555502    | 0.995881  |
| rs7934726  | A/G     | 11     | 113415486    | 0.999542  |
| rs2507874  | A/C     | 11     | 114433145    | 0.999542  |
| rs7103514  | A/G     | 11     | 117325771    | 0.999085  |
| rs647975   | C/T     | 11     | 117543951    | 0.994508  |
| rs12273026 | A/G     | 11     | 119955531    | 0.99405   |
| rs509334   | A/G     | 11     | 120783128    | 0.999085  |
| rs7952397  | T/C     | 11     | 122562351    | 0.999085  |
| rs1942662  | A/T     | 11     | 124037710    | 0.998627  |

Supplementary Table 6 Physical position and call rates for 1354 ancestry informative markers used in the admixture scan

| SNP        | Alleles | Chromo | Phy_Position | Call rate |
|------------|---------|--------|--------------|-----------|
| rs10893538 | A/G     | 11     | 125927580    | 0.998627  |
| rs2514895  | C/T     | 11     | 126615393    | 0.999542  |
| rs103610   | A/C     | 11     | 130918629    | 0.998169  |
| rs2226633  | T/C     | 11     | 131825604    | 0.998627  |
| rs6590705  | A/C     | 11     | 132839732    | 0.999085  |
| rs470713   | A/G     | 11     | 133503108    | 0.998627  |
| rs124440   | C/G     | 12     | 202923       | 0.999085  |
| rs7967165  | C/T     | 12     | 950268       | 0.992677  |
| rs11062437 | A/G     | 12     | 2947460      | 0.995881  |
| rs10744614 | A/C     | 12     | 3425163      | 0.998627  |
| rs11063488 | T/G     | 12     | 5057090      | 0.977574  |
| rs7303229  | A/T     | 12     | 5540711      | 0.998627  |
| rs3782711  | C/T     | 12     | 6053442      | 0.994508  |
| rs11064432 | C/G     | 12     | 6839002      | 0.998169  |
| rs10840686 | C/G     | 12     | 8152917      | 0.983982  |
| rs10845099 | G/C     | 12     | 10312069     | 0.999542  |
| rs1861482  | A/C     | 12     | 11724925     | 0.999542  |
| rs10772518 | C/G     | 12     | 12017303     | 0.999542  |
| rs850918   | C/G     | 12     | 13033441     | 0.999542  |
| rs7310891  | A/G     | 12     | 14707830     | 0.997254  |
| rs984303   | A/G     | 12     | 15641658     | 0.997254  |
| rs7967366  | C/T     | 12     | 19079208     | 0.997254  |
| rs10841722 | A/G     | 12     | 21057358     | 0.999085  |
| rs4350408  | A/C     | 12     | 22043980     | 0.997712  |
| rs4514479  | G/C     | 12     | 23300566     | 0.999085  |
| rs7307747  | C/T     | 12     | 25389896     | 0.990389  |
| rs7975017  | C/T     | 12     | 26320060     | 0.998169  |
| rs7963493  | C/T     | 12     | 26526342     | 0.998627  |
| rs299478   | A/G     | 12     | 29598519     | 0.999085  |
| rs4931655  | A/G     | 12     | 32949329     | 0.994508  |
| rs7978988  | A/G     | 12     | 34288146     | 0.99405   |
| rs11182432 | A/C     | 12     | 42855115     | 1         |
| rs2471601  | A/C     | 12     | 45234926     | 1         |
| rs7970314  | A/G     | 12     | 46594441     | 0.999542  |
| rs615382   | A/C     | 12     | 48699178     | 0.998169  |
| rs7306523  | A/G     | 12     | 51680231     | 0.996339  |
| rs11171526 | A/T     | 12     | 54192728     | 0.999542  |
| rs10876851 | A/C     | 12     | 54471828     | 0.997712  |
| rs899653   | C/T     | 12     | 56170068     | 0.998169  |
| rs7132009  | A/G     | 12     | 58873307     | 0.994508  |
| rs35445530 | A/C     | 12     | 63541720     | 0.998169  |
| rs11175885 | A/G     | 12     | 64400897     | 0.998627  |

Supplementary Table 6 Physical position and call rates for 1354 ancestry informative markers used in the admixture scan

| SNP        | Alleles | Chromo | Phy_Position | Call rate |
|------------|---------|--------|--------------|-----------|
| rs10878561 | A/G     | 12     | 65791320     | 0.999085  |
| rs918003   | A/G     | 12     | 66562762     | 0.998627  |
| rs10784930 | T/C     | 12     | 70374571     | 0.999542  |
| rs460406   | A/G     | 12     | 71298182     | 0.999542  |
| rs7967984  | A/T     | 12     | 74600665     | 0.997254  |
| rs10778691 | A/C     | 12     | 78722356     | 0.998169  |
| rs9651975  | A/G     | 12     | 84153007     | 0.999085  |
| rs388693   | T/C     | 12     | 87675180     | 1         |
| rs2731232  | C/G     | 12     | 89076579     | 0.997254  |
| rs7975526  | C/G     | 12     | 93545307     | 0.998627  |
| rs2242138  | A/C     | 12     | 100251372    | 1         |
| rs12820008 | A/C     | 12     | 101654496    | 0.998627  |
| rs6539244  | T/C     | 12     | 104853569    | 0.971625  |
| rs916682   | A/G     | 12     | 110161866    | 1         |
| rs11066430 | C/T     | 12     | 111732317    | 0.999542  |
| rs4767252  | A/C     | 12     | 113650444    | 0.991304  |
| rs1549338  | A/G     | 12     | 114625336    | 0.998627  |
| rs7969190  | C/T     | 12     | 115433412    | 0.993593  |
| rs4767461  | A/G     | 12     | 115749701    | 0.997254  |
| rs628644   | A/G     | 12     | 116567644    | 1         |
| rs280591   | C/T     | 12     | 118753438    | 0.997254  |
| rs4077055  | A/G     | 12     | 120017143    | 0.996339  |
| rs6486783  | A/G     | 12     | 120836542    | 0.994966  |
| rs1051431  | A/G     | 12     | 122170683    | 0.997254  |
| rs1070544  | A/C     | 12     | 123701245    | 0.999542  |
| rs2615667  | C/T     | 12     | 124528328    | 0.998169  |
| rs12304312 | A/G     | 12     | 125374021    | 0.987185  |
| rs12370733 | A/T     | 12     | 126380251    | 0.996796  |
| rs1560545  | T/C     | 12     | 126829145    | 0.998627  |
| rs1709704  | C/G     | 12     | 127345394    | 0.999542  |
| rs7397250  | C/T     | 12     | 130716001    | 0.995881  |
| rs11835531 | A/G     | 12     | 131187811    | 0.999542  |
| rs9551445  | C/T     | 13     | 18884472     | 0.994508  |
| rs9509008  | A/G     | 13     | 19501778     | 0.998627  |
| rs9510171  | A/G     | 13     | 21858130     | 0.99405   |
| rs4378490  | A/G     | 13     | 24810035     | 0.991762  |
| rs943724   | A/G     | 13     | 26172270     | 0.999542  |
| rs10459349 | A/G     | 13     | 26684384     | 0.997712  |
| rs7981680  | C/G     | 13     | 27791870     | 0.998169  |
| rs12100282 | C/G     | 13     | 32351449     | 0.998169  |
| rs1329667  | A/G     | 13     | 33389838     | 0.999542  |
| rs9531159  | A/T     | 13     | 35368336     | 0.996796  |

Supplementary Table 6 Physical position and call rates for 1354 ancestry informative markers used in the admixture scan

| SNP        | Alleles | Chromo | Phy_Position | Call rate |
|------------|---------|--------|--------------|-----------|
| rs9532218  | A/C     | 13     | 37858370     | 0.998627  |
| rs1572018  | A/G     | 13     | 40613282     | 0.999085  |
| rs9533771  | A/G     | 13     | 43575599     | 0.999542  |
| rs9534014  | C/G     | 13     | 44445257     | 0.997712  |
| rs9567896  | T/C     | 13     | 47075122     | 0.997254  |
| rs3751380  | A/G     | 13     | 48049420     | 0.999542  |
| rs7321057  | C/T     | 13     | 50580015     | 0.987185  |
| rs790325   | C/T     | 13     | 56527759     | 0.996796  |
| rs1622710  | C/T     | 13     | 59004926     | 0.997712  |
| rs4581589  | G/T     | 13     | 63243106     | 0.995881  |
| rs1020228  | G/T     | 13     | 66274348     | 0.998169  |
| rs11148886 | C/G     | 13     | 71178521     | 0.999542  |
| rs7333151  | A/C     | 13     | 72517230     | 0.994966  |
| rs8002907  | A/C     | 13     | 73685238     | 0.998627  |
| rs9530435  | A/G     | 13     | 74891888     | 0.996339  |
| rs3861128  | C/T     | 13     | 76630334     | 0.921739  |
| rs7332661  | A/G     | 13     | 80264252     | 0.991762  |
| rs9575430  | C/T     | 13     | 83379843     | 0.975744  |
| rs9515517  | C/T     | 13     | 88498193     | 1         |
| rs552157   | A/G     | 13     | 90913783     | 0.995423  |
| rs9788393  | A/G     | 13     | 93042338     | 0.99405   |
| rs7492028  | C/G     | 13     | 96367097     | 1         |
| rs285087   | A/G     | 13     | 97543805     | 0.919451  |
| rs987531   | A/G     | 13     | 100203984    | 0.998627  |
| rs2476230  | C/G     | 13     | 101380444    | 0.994508  |
| rs6491743  | A/G     | 13     | 102859333    | 1         |
| rs9582807  | T/G     | 13     | 103578174    | 0.998627  |
| rs11840893 | A/C     | 13     | 104180092    | 0.999085  |
| rs1999884  | C/T     | 13     | 105078603    | 0.999542  |
| rs913607   | C/G     | 13     | 105708805    | 0.999085  |
| rs7338078  | A/G     | 13     | 106289769    | 0.999085  |
| rs7989360  | T/C     | 13     | 109137998    | 0.993593  |
| rs9301448  | C/G     | 13     | 109804081    | 0.997254  |
| rs9522149  | C/T     | 13     | 110625168    | 0.999085  |
| rs1183183  | A/C     | 13     | 110934706    | 0.998627  |
| rs4907499  | C/G     | 13     | 111827429    | 1         |
| rs4630437  | C/T     | 13     | 112998037    | 0.992677  |
| rs3211416  | A/G     | 13     | 114028356    | 1         |
| rs1620265  | G/T     | 14     | 20092673     | 0.999085  |
| rs11156730 | G/T     | 14     | 20407106     | 0.993593  |
| rs6572731  | T/C     | 14     | 22307675     | 0.987643  |
| rs4982736  | A/G     | 14     | 22698306     | 0.998627  |

Supplementary Table 6 Physical position and call rates for 1354 ancestry informative markers used in the admixture scan

| SNP        | Alleles | Chromo | Phy_Position | Call rate |
|------------|---------|--------|--------------|-----------|
| rs8022613  | C/T     | 14     | 23476758     | 0.995423  |
| rs8015766  | A/C     | 14     | 25047610     | 0.999085  |
| rs1474965  | A/G     | 14     | 25946860     | 0.999085  |
| rs2332880  | A/C     | 14     | 26494304     | 0.998627  |
| rs12897779 | A/G     | 14     | 31254168     | 0.996339  |
| rs3784191  | T/C     | 14     | 31993041     | 0.998627  |
| rs1012023  | T/G     | 14     | 33025960     | 0.998169  |
| rs12891015 | C/G     | 14     | 33911450     | 0.999542  |
| rs1012913  | A/G     | 14     | 36014397     | 0.932265  |
| rs1956424  | A/G     | 14     | 36601653     | 0.996339  |
| rs6572174  | A/G     | 14     | 42345547     | 0.998627  |
| rs17115651 | A/G     | 14     | 44385429     | 0.998627  |
| rs1954231  | A/G     | 14     | 46497850     | 0.998169  |
| rs7146139  | A/G     | 14     | 50320907     | 0.995423  |
| rs1057804  | A/C     | 14     | 51503805     | 0.999085  |
| rs1888344  | C/T     | 14     | 53398432     | 1         |
| rs8009244  | A/G     | 14     | 54713505     | 0.899314  |
| rs7143380  | A/C     | 14     | 55503022     | 1         |
| rs8019850  | C/T     | 14     | 56755187     | 0.995881  |
| rs12897140 | G/C     | 14     | 61031163     | 0.999085  |
| rs2356515  | C/G     | 14     | 62917974     | 0.998169  |
| rs1953233  | A/G     | 14     | 64642915     | 0.993593  |
| rs2144061  | A/G     | 14     | 66596315     | 0.996339  |
| rs4899321  | A/G     | 14     | 69431901     | 0.998169  |
| rs6574072  | G/C     | 14     | 71937086     | 1         |
| rs8022535  | C/T     | 14     | 75131136     | 0.998627  |
| rs7157792  | A/G     | 14     | 76422856     | 0.995423  |
| rs987644   | T/C     | 14     | 78313798     | 0.999085  |
| rs221436   | C/T     | 14     | 79204123     | 0.999542  |
| rs1384631  | A/G     | 14     | 84357757     | 0.977117  |
| rs11159698 | A/G     | 14     | 84835008     | 0.99222   |
| rs1009799  | A/G     | 14     | 86995711     | 0.999542  |
| rs7141800  | C/T     | 14     | 88874260     | 1         |
| rs3825663  | C/T     | 14     | 89499502     | 0.998169  |
| rs8013195  | A/G     | 14     | 90310700     | 0.990389  |
| rs6575264  | T/C     | 14     | 92054866     | 0.998169  |
| rs8022629  | A/G     | 14     | 94004861     | 0.998627  |
| rs8015314  | A/G     | 14     | 94508981     | 0.99222   |
| rs2369049  | A/G     | 14     | 95241604     | 0.999542  |
| rs4905581  | A/G     | 14     | 96671355     | 0.998627  |
| rs1003229  | C/T     | 14     | 97241370     | 0.976659  |
| rs9323995  | A/G     | 14     | 98240492     | 0.998627  |

Supplementary Table 6 Physical position and call rates for 1354 ancestry informative markers used in the admixture scan

| SNP        | Alleles | Chromo | Phy_Position | Call rate |
|------------|---------|--------|--------------|-----------|
| rs1191022  | A/T     | 14     | 99515059     | 1         |
| rs10142224 | C/T     | 14     | 105079690    | 0.997254  |
| rs17112080 | A/G     | 14     | 106303947    | 0.996339  |
| rs6606825  | A/C     | 15     | 20614243     | 0.992677  |
| rs6576551  | A/G     | 15     | 24027268     | 1         |
| rs8042276  | A/G     | 15     | 25367670     | 0.993135  |
| rs1448484  | A/G     | 15     | 25957036     | 0.998169  |
| rs11070208 | G/T     | 15     | 27102607     | 0.997254  |
| rs2004657  | C/T     | 15     | 27421806     | 0.996339  |
| rs7173247  | C/T     | 15     | 31246185     | 0.999542  |
| rs480616   | T/C     | 15     | 32057267     | 0.999542  |
| rs1376785  | A/G     | 15     | 32900002     | 0.995423  |
| rs1037575  | C/T     | 15     | 33527874     | 0.998627  |
| rs8035530  | C/T     | 15     | 36084358     | 0.99405   |
| rs275187   | C/G     | 15     | 37215985     | 0.989931  |
| rs679882   | C/T     | 15     | 38546639     | 0.996796  |
| rs199138   | A/G     | 15     | 43174842     | 0.999085  |
| rs2675345  | A/G     | 15     | 46187491     | 1         |
| rs1873813  | T/C     | 15     | 51082540     | 0.99405   |
| rs16977374 | A/C     | 15     | 55368884     | 0.999085  |
| rs11071428 | T/C     | 15     | 57402133     | 1         |
| rs974828   | C/T     | 15     | 58642847     | 0.999542  |
| rs11071682 | A/G     | 15     | 60740506     | 1         |
| rs8033972  | A/G     | 15     | 62312033     | 0.999085  |
| rs7162991  | T/C     | 15     | 66419366     | 1         |
| rs4777126  | C/T     | 15     | 67294514     | 0.996339  |
| rs7402101  | C/T     | 15     | 69841884     | 0.998627  |
| rs3087652  | T/C     | 15     | 70422957     | 0.99222   |
| rs6495489  | A/G     | 15     | 78409622     | 0.998169  |
| rs4238528  | A/G     | 15     | 79406760     | 0.997712  |
| rs1905233  | G/C     | 15     | 79630386     | 0.934554  |
| rs8040248  | C/T     | 15     | 82519409     | 0.999085  |
| rs2859553  | A/T     | 15     | 85301162     | 0.999542  |
| rs7170666  | T/C     | 15     | 86955970     | 0.998169  |
| rs3844110  | C/T     | 15     | 88315951     | 0.998169  |
| rs977681   | A/T     | 15     | 89583263     | 0.996339  |
| rs6496858  | A/G     | 15     | 90062853     | 0.978947  |
| rs11630692 | C/T     | 15     | 90791157     | 0.998627  |
| rs1479828  | A/G     | 15     | 92417738     | 0.991762  |
| rs957703   | A/G     | 15     | 93610134     | 0.998627  |
| rs4451923  | T/C     | 15     | 95740153     | 0.996339  |
| rs2063275  | C/T     | 15     | 97411591     | 0.999542  |



Supplementary Table 6 Physical position and call rates for 1354 ancestry informative markers used in the admixture scan

| SNP        | Alleles | Chromo | Phy_Position | Call rate |
|------------|---------|--------|--------------|-----------|
| rs2581468  | A/G     | 15     | 97929991     | 0.991304  |
| rs2622530  | A/G     | 15     | 98390477     | 0.995423  |
| rs7175787  | A/G     | 15     | 99216323     | 0.999542  |
| rs4965814  | C/T     | 15     | 99631440     | 0.997712  |
| rs2562182  | A/G     | 16     | 73946        | 0.983524  |
| rs6500552  | C/T     | 16     | 3699394      | 1         |
| rs10775349 | C/G     | 16     | 4019824      | 0.998627  |
| rs12933048 | T/C     | 16     | 5634379      | 0.999085  |
| rs8061597  | A/C     | 16     | 6245103      | 0.995881  |
| rs4787040  | A/T     | 16     | 7500981      | 0.999542  |
| rs11077228 | C/G     | 16     | 7797996      | 0.999085  |
| rs9925564  | A/G     | 16     | 9136557      | 0.997712  |
| rs7204918  | A/G     | 16     | 12823080     | 0.997254  |
| rs1557519  | C/T     | 16     | 14158804     | 0.985355  |
| rs7187018  | A/G     | 16     | 17107926     | 0.996796  |
| rs739564   | C/T     | 16     | 19647738     | 0.996339  |
| rs4780278  | A/G     | 16     | 20195479     | 0.998627  |
| rs4783432  | T/C     | 16     | 21858916     | 0.999542  |
| rs1503949  | C/T     | 16     | 22866185     | 0.996796  |
| rs8045868  | C/T     | 16     | 24872019     | 0.997712  |
| rs1423076  | C/G     | 16     | 26435032     | 0.999085  |
| rs7203982  | C/T     | 16     | 28862361     | 0.999085  |
| rs8046826  | A/G     | 16     | 46730882     | 0.993135  |
| rs4785155  | C/T     | 16     | 47561279     | 0.995881  |
| rs9934908  | C/T     | 16     | 50234093     | 0.996339  |
| rs3912519  | A/G     | 16     | 50440889     | 0.999542  |
| rs4784375  | A/G     | 16     | 52953863     | 0.996796  |
| rs901439   | A/G     | 16     | 53686238     | 0.999542  |
| rs1787785  | A/T     | 16     | 55899882     | 0.988101  |
| rs6499886  | T/C     | 16     | 56171159     | 0.997254  |
| rs7191378  | A/G     | 16     | 56672535     | 0.998169  |
| rs7198976  | C/G     | 16     | 58487027     | 0.997712  |
| rs9925755  | G/C     | 16     | 59426530     | 0.973913  |
| rs6498910  | T/C     | 16     | 62219139     | 1         |
| rs3843712  | C/T     | 16     | 65491654     | 0.997712  |
| rs12444204 | C/T     | 16     | 72040453     | 1         |
| rs9928718  | G/T     | 16     | 73634239     | 0.998627  |
| rs7201030  | A/G     | 16     | 75081293     | 0.998627  |
| rs4516239  | A/G     | 16     | 77004103     | 0.999542  |
| rs9923225  | A/C     | 16     | 77471501     | 0.997254  |
| rs2287975  | C/T     | 16     | 78107568     | 0.999542  |
| rs4889024  | A/C     | 16     | 78353697     | 0.991304  |

Supplementary Table 6 Physical position and call rates for 1354 ancestry informative markers used in the admixture scan

| SNP        | Alleles | Chromo | Phy_Position | Call rate |
|------------|---------|--------|--------------|-----------|
| rs6564771  | C/G     | 16     | 79199290     | 0.999085  |
| rs4278742  | T/C     | 16     | 80959798     | 0.990389  |
| rs4782812  | A/C     | 16     | 82121112     | 0.998169  |
| rs8053934  | C/G     | 16     | 82576092     | 0.989474  |
| rs4280248  | C/T     | 16     | 84619550     | 0.997254  |
| rs1728390  | C/G     | 16     | 84971560     | 0.950572  |
| rs3922878  | T/G     | 16     | 85412205     | 0.995881  |
| rs4843607  | T/C     | 16     | 85993724     | 0.997712  |
| rs6500465  | A/G     | 16     | 88680668     | 1         |
| rs7208188  | C/T     | 17     | 113034       | 0.979405  |
| rs11872025 | A/G     | 17     | 683710       | 0.998169  |
| rs4790359  | T/C     | 17     | 2578735      | 0.999542  |
| rs11870382 | A/G     | 17     | 3445855      | 0.99405   |
| rs8070464  | T/C     | 17     | 4459241      | 0.99405   |
| rs9911673  | T/C     | 17     | 5641682      | 0.996796  |
| rs2287499  | G/C     | 17     | 7532893      | 0.989931  |
| rs4791367  | A/G     | 17     | 9665099      | 0.992677  |
| rs8075550  | A/G     | 17     | 10967784     | 0.999085  |
| rs237303   | A/T     | 17     | 12376639     | 0.997254  |
| rs4792286  | T/C     | 17     | 12684478     | 0.999542  |
| rs8080590  | C/G     | 17     | 14171999     | 0.99405   |
| rs4791595  | T/A     | 17     | 14508979     | 0.998627  |
| rs758857   | A/G     | 17     | 15794982     | 0.996339  |
| rs7223820  | A/G     | 17     | 17211843     | 0.998627  |
| rs4924980  | C/T     | 17     | 19145456     | 0.998627  |
| rs2958458  | A/G     | 17     | 20655970     | 0.999085  |
| rs8079412  | A/T     | 17     | 26301240     | 0.995881  |
| rs6505324  | G/T     | 17     | 28354977     | 0.997254  |
| rs7222177  | C/T     | 17     | 29368497     | 0.999542  |
| rs212498   | A/G     | 17     | 29755162     | 0.99405   |
| rs2735484  | A/C     | 17     | 31358760     | 0.935469  |
| rs6607358  | T/C     | 17     | 32389367     | 0.947368  |
| rs739753   | A/T     | 17     | 33118390     | 1         |
| rs2593595  | A/G     | 17     | 38309771     | 1         |
| rs7226263  | A/G     | 17     | 42170068     | 0.995423  |
| rs1910211  | G/T     | 17     | 48878079     | 0.998169  |
| rs3760281  | A/G     | 17     | 51157210     | 0.993135  |
| rs1019117  | C/T     | 17     | 52103128     | 0.999085  |
| rs884379   | C/T     | 17     | 52758342     | 0.965675  |
| rs7214631  | C/G     | 17     | 55947947     | 0.999085  |
| rs1427463  | C/T     | 17     | 59923044     | 0.999542  |
| rs719934   | A/G     | 17     | 62430855     | 0.991762  |

Supplementary Table 6 Physical position and call rates for 1354 ancestry informative markers used in the admixture scan

| SNP        | Alleles | Chromo | Phy_Position | Call rate |
|------------|---------|--------|--------------|-----------|
| rs8077384  | C/T     | 17     | 63674826     | 0.998627  |
| rs2430522  | A/C     | 17     | 67204284     | 0.997712  |
| rs16977110 | T/C     | 17     | 67659465     | 0.993593  |
| rs903104   | C/T     | 17     | 68536297     | 0.999542  |
| rs9896656  | C/T     | 17     | 69286243     | 0.998169  |
| rs1107704  | A/G     | 17     | 70020020     | 0.998169  |
| rs9899687  | A/G     | 17     | 70869854     | 0.999542  |
| rs9895309  | A/G     | 17     | 71946569     | 0.998627  |
| rs771722   | A/G     | 17     | 72394995     | 0.989474  |
| rs7218173  | C/G     | 17     | 73184071     | 0.999085  |
| rs8074370  | A/G     | 17     | 74468926     | 0.997712  |
| rs4969421  | A/G     | 17     | 76925231     | 0.983982  |
| rs568273   | A/G     | 18     | 600157       | 0.998169  |
| rs439890   | C/T     | 18     | 3710081      | 0.994966  |
| rs4797155  | C/T     | 18     | 4251884      | 0.999542  |
| rs2874686  | C/T     | 18     | 5397839      | 0.999085  |
| rs897351   | G/T     | 18     | 6092146      | 0.996796  |
| rs571324   | A/G     | 18     | 7035121      | 0.997254  |
| rs1893223  | C/G     | 18     | 7599137      | 0.999542  |
| rs629699   | C/T     | 18     | 8825869      | 0.999085  |
| rs1869735  | C/G     | 18     | 9690456      | 0.999085  |
| rs545056   | G/C     | 18     | 10555281     | 0.998169  |
| rs456908   | C/G     | 18     | 11308729     | 0.999085  |
| rs16976596 | C/T     | 18     | 11686613     | 0.997712  |
| rs3764962  | A/G     | 18     | 18017009     | 0.994966  |
| rs7243722  | A/T     | 18     | 19997389     | 0.998169  |
| rs2155771  | T/G     | 18     | 24818125     | 0.999542  |
| rs12960708 | A/G     | 18     | 25692301     | 0.999542  |
| rs4436849  | A/C     | 18     | 28809444     | 1         |
| rs550139   | C/T     | 18     | 30978322     | 0.998627  |
| rs647853   | A/C     | 18     | 38442742     | 0.998627  |
| rs684289   | A/G     | 18     | 39220883     | 0.995881  |
| rs11082588 | C/T     | 18     | 43244969     | 0.993593  |
| rs1877415  | A/G     | 18     | 44303255     | 0.998627  |
| rs9945724  | C/T     | 18     | 44694487     | 0.999542  |
| rs6508087  | A/G     | 18     | 47551726     | 0.998627  |
| rs529067   | T/C     | 18     | 50107039     | 0.998627  |
| rs11151970 | A/C     | 18     | 52422369     | 0.994508  |
| rs1942920  | C/G     | 18     | 55790389     | 0.998627  |
| rs758811   | A/C     | 18     | 57154484     | 0.998627  |
| rs9320033  | C/T     | 18     | 59735962     | 0.999085  |
| rs4377248  | A/C     | 18     | 60013901     | 0.997254  |

Supplementary Table 6 Physical position and call rates for 1354 ancestry informative markers used in the admixture scan

| SNP        | Alleles | Chromo | Phy_Position | Call rate |
|------------|---------|--------|--------------|-----------|
| rs17061875 | A/G     | 18     | 61973673     | 0.979863  |
| rs4891724  | A/G     | 18     | 64961189     | 0.999542  |
| rs4891384  | A/G     | 18     | 65775534     | 0.997712  |
| rs4891408  | A/G     | 18     | 66375618     | 0.998627  |
| rs634392   | C/T     | 18     | 68367025     | 0.999542  |
| rs1367345  | A/G     | 18     | 69633470     | 0.997254  |
| rs898487   | A/G     | 18     | 71628874     | 0.997712  |
| rs590218   | A/G     | 18     | 72198871     | 0.998169  |
| rs874299   | C/T     | 18     | 73185272     | 0.989931  |
| rs4798954  | A/G     | 18     | 73939290     | 0.993135  |
| rs483346   | C/T     | 18     | 74817865     | 1         |
| rs8110664  | C/G     | 19     | 2834136      | 0.994966  |
| rs6510761  | T/C     | 19     | 3516909      | 0.993593  |
| rs1865028  | C/T     | 19     | 5966066      | 1         |
| rs8106856  | G/T     | 19     | 6322798      | 0.998627  |
| rs308197   | A/T     | 19     | 6786440      | 0.994508  |
| rs10401786 | A/G     | 19     | 7766764      | 1         |
| rs8113531  | A/G     | 19     | 9104893      | 0.998627  |
| rs13346361 | G/T     | 19     | 9561908      | 0.999542  |
| rs399878   | T/C     | 19     | 11295505     | 0.999542  |
| rs2052474  | A/G     | 19     | 11517995     | 0.991762  |
| rs2900918  | C/T     | 19     | 13366333     | 0.989474  |
| rs2607276  | G/T     | 19     | 13815633     | 0.97849   |
| rs2242143  | C/G     | 19     | 16162544     | 0.961556  |
| rs901792   | C/T     | 19     | 16652443     | 0.998627  |
| rs12972417 | C/T     | 19     | 17386314     | 0.995423  |
| rs6511061  | T/C     | 19     | 19915823     | 0.999085  |
| rs1850930  | C/T     | 19     | 21631302     | 0.999542  |
| rs867815   | C/T     | 19     | 34225922     | 0.999542  |
| rs7259371  | A/G     | 19     | 38226481     | 0.998627  |
| rs562638   | A/G     | 19     | 44541629     | 0.999542  |
| rs2231738  | C/T     | 19     | 45141888     | 1         |
| rs873910   | G/T     | 19     | 46776635     | 0.999542  |
| rs1205817  | C/T     | 19     | 47295616     | 0.992677  |
| rs846870   | C/T     | 19     | 49778186     | 0.999085  |
| rs7255770  | A/G     | 19     | 50531860     | 0.999085  |
| rs2974190  | C/T     | 19     | 52752878     | 0.999542  |
| rs274883   | A/G     | 19     | 53314357     | 0.987185  |
| rs1879266  | C/G     | 19     | 54681872     | 0.994508  |
| rs1626153  | C/G     | 19     | 56477836     | 0.997254  |
| rs8112502  | A/G     | 19     | 57315134     | 0.967506  |
| rs3745099  | A/G     | 19     | 57593717     | 0.98627   |

Supplementary Table 6 Physical position and call rates for 1354 ancestry informative markers used in the admixture scan

| SNP        | Alleles | Chromo | Phy_Position | Call rate |
|------------|---------|--------|--------------|-----------|
| rs1650940  | C/G     | 19     | 58199111     | 1         |
| rs3826756  | C/G     | 19     | 59106535     | 0.998169  |
| rs890869   | C/T     | 19     | 60324855     | 0.999085  |
| rs3810168  | C/T     | 19     | 60588521     | 0.959268  |
| rs11673628 | C/G     | 19     | 61314878     | 0.998627  |
| rs2009609  | C/T     | 19     | 62955811     | 0.996796  |
| rs8109437  | T/C     | 19     | 63644139     | 0.995881  |
| rs2077713  | A/G     | 20     | 166783       | 0.997712  |
| rs554362   | T/C     | 20     | 850002       | 0.993593  |
| rs1418032  | C/G     | 20     | 2025744      | 1         |
| rs16990309 | T/C     | 20     | 4784440      | 0.999085  |
| rs6133313  | A/C     | 20     | 6355326      | 0.999085  |
| rs2294306  | A/G     | 20     | 7817025      | 0.998627  |
| rs1883488  | C/T     | 20     | 9353752      | 0.999085  |
| rs2207102  | G/T     | 20     | 11244026     | 0.998169  |
| rs646814   | C/T     | 20     | 12939536     | 0.991762  |
| rs2876410  | A/G     | 20     | 15502753     | 0.998169  |
| rs6046024  | C/T     | 20     | 19294184     | 0.998627  |
| rs2064949  | A/G     | 20     | 19756654     | 0.999542  |
| rs1203915  | C/T     | 20     | 22520504     | 0.998627  |
| rs1743488  | C/G     | 20     | 23997674     | 0.998169  |
| rs11905777 | A/C     | 20     | 29655754     | 0.997712  |
| rs880113   | A/G     | 20     | 30591963     | 0.998627  |
| rs4911320  | G/T     | 20     | 31377692     | 0.997712  |
| rs3092776  | C/T     | 20     | 38136423     | 0.998627  |
| rs6101991  | A/G     | 20     | 38515722     | 0.979405  |
| rs6029503  | C/G     | 20     | 39053501     | 0.999542  |
| rs730467   | C/T     | 20     | 41334099     | 0.998627  |
| rs7263518  | C/T     | 20     | 42263105     | 0.982609  |
| rs914828   | C/T     | 20     | 45050724     | 0.997712  |
| rs6018424  | C/T     | 20     | 45420391     | 0.997712  |
| rs2426057  | C/G     | 20     | 46001243     | 1         |
| rs768538   | G/T     | 20     | 49467099     | 0.998169  |
| rs1883999  | C/T     | 20     | 50643470     | 0.997712  |
| rs4811429  | A/G     | 20     | 51458409     | 1         |
| rs2426515  | C/T     | 20     | 52506124     | 0.998169  |
| rs1028546  | C/T     | 20     | 53171407     | 0.994508  |
| rs1821808  | C/T     | 20     | 53979208     | 0.998627  |
| rs2426641  | A/G     | 20     | 54725667     | 1         |
| rs1318379  | A/C     | 20     | 55194692     | 0.97254   |
| rs6015097  | C/T     | 20     | 55856860     | 0.998627  |
| rs580897   | G/T     | 20     | 58108837     | 0.998627  |

Supplementary Table 6 Physical position and call rates for 1354 ancestry informative markers used in the admixture scan

| SNP        | Alleles | Chromo | Phy_Position | Call rate |
|------------|---------|--------|--------------|-----------|
| rs16984321 | A/G     | 20     | 58809363     | 1         |
| rs2151512  | A/G     | 20     | 60346890     | 0.983524  |
| rs310644   | C/T     | 20     | 61629948     | 0.995423  |
| rs722098   | A/G     | 21     | 15607469     | 1         |
| rs9977149  | A/C     | 21     | 15936071     | 0.999542  |
| rs2823880  | T/G     | 21     | 16850425     | 0.998627  |
| rs2824687  | C/G     | 21     | 18474680     | 0.988558  |
| rs1487940  | C/T     | 21     | 20525155     | 0.999085  |
| rs9983989  | A/T     | 21     | 24239640     | 0.998627  |
| rs9977512  | A/G     | 21     | 24556659     | 0.999542  |
| rs380417   | C/T     | 21     | 26194030     | 0.999542  |
| rs2070398  | A/C     | 21     | 29800235     | 0.992677  |
| rs2284473  | A/G     | 21     | 31450991     | 0.999085  |
| rs2833775  | G/T     | 21     | 32634146     | 0.997254  |
| rs2834670  | A/G     | 21     | 35202246     | 0.998169  |
| rs718387   | A/G     | 21     | 36049947     | 0.996339  |
| rs2835367  | C/T     | 21     | 36805244     | 0.989474  |
| rs2836181  | A/G     | 21     | 38477680     | 0.999085  |
| rs1209914  | A/G     | 21     | 39074242     | 0.999542  |
| rs766850   | A/G     | 21     | 41468687     | 0.994508  |
| rs369908   | A/G     | 21     | 41689003     | 0.99405   |
| rs220245   | C/T     | 21     | 42332241     | 0.997254  |
| rs605781   | C/T     | 21     | 43558435     | 0.959725  |
| rs9306171  | A/G     | 21     | 44283206     | 0.988101  |
| rs9618000  | A/G     | 22     | 16228268     | 0.999542  |
| rs5992751  | A/G     | 22     | 16454708     | 0.990389  |
| rs362249   | T/C     | 22     | 16984664     | 0.999085  |
| rs444763   | A/G     | 22     | 19767837     | 1         |
| rs737796   | G/T     | 22     | 20762604     | 0.996796  |
| rs139676   | A/G     | 22     | 23573319     | 0.972082  |
| rs650276   | C/T     | 22     | 25116790     | 0.998169  |
| rs743920   | C/G     | 22     | 27945682     | 0.986728  |
| rs11703808 | A/G     | 22     | 30349534     | 0.991304  |
| rs4417800  | A/G     | 22     | 32288344     | 0.999085  |
| rs5999762  | A/G     | 22     | 33924336     | 0.997712  |
| rs739200   | A/T     | 22     | 34756837     | 0.998169  |
| rs932327   | A/G     | 22     | 36229673     | 0.993593  |
| rs12159761 | C/G     | 22     | 37597141     | 0.997712  |
| rs6002476  | A/C     | 22     | 40493381     | 0.994508  |
| rs9612037  | C/T     | 22     | 42025266     | 0.997712  |
| rs4823209  | C/T     | 22     | 42986345     | 0.983982  |
| rs6007220  | T/C     | 22     | 43347041     | 0.998627  |

Supplementary Table 6 Physical position and call rates for 1354 ancestry informative markers used in the admixture scan

| SNP        | Alleles | Chromo | Phy_Position | Call rate |
|------------|---------|--------|--------------|-----------|
| rs6007573  | A/G     | 22     | 43995651     | 0.974828  |
| rs1028528  | A/G     | 22     | 46682809     | 0.998169  |
| rs4824056  | A/G     | 22     | 48248934     | 0.984897  |
| rs6520141  | A/G     | 22     | 48609206     | 0.996796  |
| rs8142477  | C/G     | 22     | 49301520     | 0.994508  |
| rs6530109  | A/G     | X      | 4169198      | 0.996796  |
| rs5948775  | A/T     | X      | 6338291      | 0.982151  |
| rs5978365  | A/G     | X      | 9816188      | 0.994966  |
| rs1474458  | A/G     | X      | 10806797     | 0.987185  |
| rs1013549  | C/T     | X      | 11920721     | 0.994966  |
| rs1007420  | A/G     | X      | 17405350     | 0.997254  |
| rs5955757  | A/G     | X      | 19133496     | 0.99405   |
| rs7889874  | A/G     | X      | 20193158     | 0.998169  |
| rs9306764  | C/T     | X      | 21902011     | 0.998169  |
| rs5926178  | C/T     | X      | 22735042     | 0.997254  |
| rs5944257  | A/G     | X      | 25762033     | 0.998169  |
| rs1482953  | T/C     | X      | 28613655     | 0.968421  |
| rs6631456  | G/T     | X      | 31788314     | 0.999085  |
| rs2336656  | T/C     | X      | 35851166     | 0.992677  |
| rs7876845  | G/C     | X      | 36197205     | 0.998627  |
| rs7054363  | A/G     | X      | 37645852     | 0.997254  |
| rs12687359 | A/T     | X      | 39701849     | 0.997254  |
| rs5917380  | T/C     | X      | 40297074     | 0.995881  |
| rs1780838  | C/T     | X      | 45320574     | 0.998627  |
| rs1936655  | A/G     | X      | 45822373     | 0.978947  |
| rs1414370  | A/C     | X      | 63232776     | 0.999085  |
| rs1408784  | A/G     | X      | 68409905     | 0.978032  |
| rs5981317  | C/T     | X      | 74072365     | 0.999085  |
| rs1015736  | A/C     | X      | 85494829     | 0.999085  |
| rs12388812 | G/T     | X      | 87034552     | 0.998169  |
| rs1198718  | C/G     | X      | 92278548     | 0.983982  |
| rs319638   | A/G     | X      | 97023560     | 0.99405   |
| rs1020903  | A/G     | X      | 98959539     | 0.999542  |
| rs5962536  | T/A     | X      | 104530634    | 0.99405   |
| rs647000   | C/G     | X      | 111861808    | 0.998169  |
| rs5956063  | A/T     | X      | 117384262    | 0.999085  |
| rs5957220  | C/T     | X      | 118624372    | 0.995881  |
| rs2192257  | A/G     | X      | 119298785    | 0.998169  |
| rs3761557  | A/G     | X      | 122041004    | 0.995423  |
| rs171259   | G/T     | X      | 127191935    | 0.997254  |
| rs909657   | A/G     | X      | 128509102    | 0.99222   |
| rs926228   | A/T     | X      | 132447904    | 0.998169  |

Supplementary Table 6 Physical position and call rates for 1354 ancestry informative markers used in the admixture scan

| SNP        | Alleles | Chromo | Phy_Position | Call rate |
|------------|---------|--------|--------------|-----------|
| rs6528455  | C/G     | X      | 136165726    | 0.997254  |
| rs12687833 | C/T     | X      | 138567527    | 0.996339  |
| rs6528890  | A/G     | X      | 140467747    | 0.996796  |
| rs12389458 | A/G     | X      | 141419331    | 0.932723  |
| rs5945496  | C/G     | X      | 143397449    | 0.996339  |
| rs5920316  | A/T     | X      | 145612760    | 0.993593  |
| rs12012275 | A/G     | X      | 147649275    | 0.99405   |
| rs222415   | C/T     | X      | 149505004    | 0.997712  |
| rs7054554  | A/G     | X      | 150935421    | 0.989474  |
| rs5945413  | A/T     | X      | 153084598    | 0.988101  |
| rs12557310 | C/T     | X      | 154299402    | 0.998169  |



**Supplementary Table 7** Distribution of *MYH9* genotypes by non-diabetic ESRD case-control status and corresponding unadjusted OR and 95% CI, by status of ancestral background on chromosome 22q12 (0, 1 or 2 copies of the African ancestral chromosome)

| <b>0 copies of the African ancestral chromosome</b> |          |          |       |
|-----------------------------------------------------|----------|----------|-------|
| SNP                                                 | genotype | Controls | Cases |
|                                                     | GG       | 0        | 0     |
| rs7078                                              | GA       | 1        | 3     |
|                                                     | AA       | 4        | 1     |
|                                                     |          |          |       |
|                                                     | AA       | 0        | 0     |
| rs12107                                             | AG       | 1        | 0     |
|                                                     | GG       | 3        | 4     |
|                                                     |          |          |       |
|                                                     | GG       | 3        | 1     |
| rs735853                                            | GC       | 1        | 2     |
|                                                     | CC       | 1        | 0     |
|                                                     |          |          |       |
|                                                     | CC       | 0        | 0     |
| rs5756129                                           | CT       | 0        | 3     |
|                                                     | TT       | 4        | 1     |
|                                                     |          |          |       |
|                                                     | TT       | 0        | 0     |
| rs5756130                                           | TC       | 0        | 1     |
|                                                     | CC       | 5        | 3     |
|                                                     |          |          |       |
|                                                     | CC       | 0        | 0     |
| rs875725                                            | TC       | 0        | 0     |
|                                                     | TT       | 5        | 4     |
|                                                     |          |          |       |
|                                                     | TT       | 4        | 4     |
| rs4821480                                           | TG       | 1        | 0     |
|                                                     | GG       | 0        | 0     |
|                                                     |          |          |       |
|                                                     | TT       | 17       | 8     |
| rs2032487                                           | TC       | 84       | 33    |
|                                                     | CC       | 2        | 7     |
|                                                     |          |          |       |
|                                                     | TT       | 4        | 4     |
| rs4821481                                           | TC       | 1        | 0     |
|                                                     | CC       | 0        | 0     |
|                                                     |          |          |       |
|                                                     | CC       | 2        | 2     |
| rs3752462                                           | CT       | 3        | 2     |
|                                                     | TT       | 0        | 0     |

| <b>0 copies of the African ancestral chromosome</b> |          |          |       |
|-----------------------------------------------------|----------|----------|-------|
| SNP                                                 | genotype | Controls | Cases |
|                                                     | GG       | 4        | 4     |
| rs5756152                                           | AG       | 1        | 0     |
|                                                     | AA       | 0        | 0     |
|                                                     | CC       | 4        | 3     |
| rs1005570                                           | AG       | 1        | 1     |
|                                                     | AA       | 0        | 0     |
|                                                     | CC       | 4        | 4     |
| rs16996674                                          | TC       | 1        | 0     |
|                                                     | TT       | 0        | 0     |
|                                                     | GG       | 4        | 4     |
| rs16996677                                          | AG       | 1        | 0     |
|                                                     | AA       | 0        | 0     |

\*no odds ratios were estimated due to the sparse cells

**Supplementary Table 7 (cont.)** Distribution of *MYH9* genotypes by non-diabetic ESRD case-control status and corresponding unadjusted OR and 95% CI, by status of ancestral background on chromosome 22q12 (0, 1 or 2 copies of the African ancestral chromosome)

| <b>1 copies of the African ancestral chromosome</b> |                 |                 |              |           |               |                |
|-----------------------------------------------------|-----------------|-----------------|--------------|-----------|---------------|----------------|
| <b>SNP</b>                                          | <b>genotype</b> | <b>Controls</b> | <b>Cases</b> | <b>OR</b> | <b>95% CI</b> | <b>P value</b> |
|                                                     | GG              | 4               | 1            | 1.00      |               |                |
| rs7078                                              | GA              | 38              | 14           | 1.47      | (0.15,14.34)  | 0.74           |
|                                                     | AA              | 63              | 35           | 2.22      | (0.24,20.66)  | 0.48           |
|                                                     |                 |                 |              |           |               |                |
|                                                     | AA              | 1               | 2            | 1.00      |               |                |
| rs12107                                             | AG              | 22              | 9            | 0.20      | (0.02,2.55)   | 0.22           |
|                                                     | GG              | 82              | 82           | 0.50      | (0.02,2.63)   | 0.24           |
|                                                     |                 |                 |              |           |               |                |
|                                                     | GG              | 0               | 0            | 1.00      |               |                |
| rs735853                                            | GC              | 49              | 18           | --        |               |                |
|                                                     | CC              | 53              | 28           | --        |               |                |
|                                                     |                 |                 |              |           |               |                |
|                                                     | CC              | 4               | 2            | 1.00      |               |                |
| rs5756129                                           | CT              | 31              | 12           | 0.77      | (0.13,4.79)   | 0.78           |
|                                                     | TT              | 68              | 33           | 0.97      | (0.17,5.57)   | 0.97           |
|                                                     |                 |                 |              |           |               |                |
|                                                     | TT              | 0               | 0            | 1.00      |               |                |
| rs5756130                                           | TC              | 18              | 6            | --        |               |                |
|                                                     | CC              | 87              | 43           | --        |               |                |
|                                                     |                 |                 |              |           |               |                |
|                                                     | CC              | 0               | 0            | 1.00      |               |                |
| rs875725                                            | TC              | 10              | 4            | --        |               |                |
|                                                     | TT              | 94              | 46           | --        |               |                |
|                                                     |                 |                 |              |           |               |                |
|                                                     | TT              | 17              | 8            | 1.00      |               |                |
| rs4821480                                           | TG              | 84              | 34           | 0.86      | (0.34,2.18)   | 0.75           |
|                                                     | GG              | 1               | 6            | 12.75     | (1.31,124.36) | 0.03           |
|                                                     |                 |                 |              |           |               |                |
|                                                     | TT              | 17              | 8            | 1.00      |               |                |
| rs2032487                                           | TC              | 84              | 33           | 0.83      | (0.33,2.12)   | 0.70           |
|                                                     | CC              | 2               | 7            | 7.44      | (1.25,44.19)  | 0.03           |
|                                                     |                 |                 |              |           |               |                |
|                                                     | TT              | 16              | 8            | 1.00      |               |                |
| rs4821481                                           | TC              | 86              | 34           | 0.79      | (0.31,2.02)   | 0.62           |
|                                                     | CC              | 1               | 6            | 12.00     | (1.23,117.41) | 0.03           |
|                                                     |                 |                 |              |           |               |                |

| 1 copies of the African ancestral chromosome |          |          |       |      |              |         |
|----------------------------------------------|----------|----------|-------|------|--------------|---------|
| SNP                                          | genotype | Controls | Cases | OR   | 95% CI       | P value |
|                                              | CC       | 6        | 2     | 1.00 |              |         |
| rs3752462                                    | CT       | 76       | 32    | 1.26 | (0.24,6.59)  | 0.78    |
|                                              | TT       | 23       | 16    | 2.09 | (0.37,11.69) | 0.40    |
|                                              |          |          |       |      |              |         |
|                                              | GG       | 68       | 33    | 1.00 |              |         |
| rs5756152                                    | AG       | 34       | 16    | 0.97 | (0.47,2)     | 0.93    |
|                                              | AA       | 0        | 2     | --   |              |         |
|                                              |          |          |       |      |              |         |
|                                              | CC       | 34       | 19    | 1.00 |              |         |
| rs1005570                                    | AG       | 63       | 25    | 0.71 | (0.34,1.47)  | 0.36    |
|                                              | AA       | 7        | 6     | 1.53 | (0.45,5.23)  | 0.49    |
|                                              |          |          |       |      |              |         |
|                                              | CC       | 71       | 30    | 1.00 |              |         |
| rs16996674                                   | TC       | 30       | 16    | 1.26 | (0.6,2.65)   | 0.54    |
|                                              | TT       | 1        | 2     | 4.73 | (0.41,54.2)  | 0.21    |
|                                              |          |          |       |      |              |         |
|                                              | GG       | 66       | 32    | 1.00 |              |         |
| rs16996677                                   | AG       | 35       | 13    | 0.77 | (0.36,1.64)  | 0.49    |
|                                              | AA       | 1        | 2     | 4.13 | (0.36,47.2)  | 0.25    |

**Supplementary Table 7 (cont.)** Distribution of *MYH9* genotypes by non-diabetic ESRD case-control status and corresponding unadjusted OR and 95% CI, by status of ancestral background on chromosome 22q12 (0, 1 or 2 copies of the African ancestral chromosome)

| <b>2 copies of the African ancestral chromosome</b> |                 |                 |              |           |               |                |
|-----------------------------------------------------|-----------------|-----------------|--------------|-----------|---------------|----------------|
| <b>SNP</b>                                          | <b>genotype</b> | <b>Controls</b> | <b>Cases</b> | <b>OR</b> | <b>95% CI</b> | <b>P value</b> |
|                                                     | GG              | 4               | 4            | 1         |               |                |
| rs7078                                              | GA              | 101             | 61           | 0.60396   | (0.15,2.5)    | 0.49           |
|                                                     | AA              | 314             | 356          | 1.133758  | (0.28,4.57)   | 0.86           |
|                                                     | AA              | 3               | 1            | 1         |               |                |
| rs12107                                             | AG              | 58              | 37           | 1.913793  | (0.19,19.03)  | 0.58           |
|                                                     | GG              | 352             | 376          | 3.204545  | (0.33,30.84)  | 0.31           |
|                                                     | GG              | 1               | 1            | 1         |               |                |
| rs735853                                            | GC              | 25              | 18           | 0.72      | (0.04,12.29)  | 0.82           |
|                                                     | CC              | 382             | 373          | 0.97644   | (0.06,15.67)  | 0.99           |
|                                                     | CC              | 13              | 6            | 1         |               |                |
| rs5756129                                           | CT              | 129             | 82           | 1.377261  | (0.5,3.77)    | 0.53           |
|                                                     | TT              | 276             | 327          | 2.567029  | (0.96,6.84)   | 0.06           |
|                                                     | TT              | 7               | 5            | 1         |               |                |
| rs5756130                                           | TC              | 94              | 63           | 0.938298  | (0.29,3.09)   | 0.92           |
|                                                     | CC              | 315             | 350          | 1.555556  | (0.49,4.95)   | 0.45           |
|                                                     | CC              | 0               | 1            | 1         |               |                |
| rs875725                                            | TC              | 55              | 45           | --        |               |                |
|                                                     | TT              | 354             | 369          | --        |               |                |
|                                                     | TT              | 16              | 14           | 1         |               |                |
| rs4821480                                           | TG              | 102             | 60           | 0.672269  | (0.31,1.47)   | 0.32           |
|                                                     | GG              | 293             | 330          | 1.287177  | (0.62,2.68)   | 0.50           |
|                                                     | TT              | 17              | 14           | 1         |               |                |
| rs2032487                                           | TC              | 151             | 89           | 0.715705  | (0.34,1.52)   | 0.38           |
|                                                     | CC              | 243             | 310          | 1.549089  | (0.75,3.2)    | 0.24           |
|                                                     | TT              | 17              | 15           | 1         |               |                |
| rs4821481                                           | TC              | 162             | 101          | 0.706584  | (0.34,1.48)   | 0.36           |
|                                                     | CC              | 238             | 302          | 1.438095  | (0.7,2.94)    | 0.32           |
|                                                     |                 |                 |              |           |               |                |

| <b>2 copies of the African ancestral chromosome</b> |                 |                 |              |           |               |                       |
|-----------------------------------------------------|-----------------|-----------------|--------------|-----------|---------------|-----------------------|
| <b>SNP</b>                                          | <b>genotype</b> | <b>Controls</b> | <b>Cases</b> | <b>OR</b> | <b>95% CI</b> | <b>P value</b>        |
|                                                     | CC              | 8               | 9            | 1         |               |                       |
| rs3752462                                           | CT              | 129             | 85           | 0.585702  | (0.22,1.58)   | 0.29                  |
|                                                     | TT              | 286             | 331          | 1.028749  | (0.39,2.7)    | 0.95                  |
|                                                     | GG              | 180             | 133          | 1         |               |                       |
| rs5756152                                           | AG              | 184             | 184          | 1.353383  | (1,1.83)      | 0.05                  |
|                                                     | AA              | 46              | 99           | 2.912717  | (1.92,4.41)   | 4.5710 <sup>-7</sup>  |
|                                                     | CC              | 98              | 65           | 1         |               |                       |
| rs1005570                                           | AG              | 212             | 169          | 1.201887  | (0.83,1.75)   | 0.33                  |
|                                                     | AA              | 104             | 182          | 2.638462  | (1.78,3.92)   | 1.52x10 <sup>-6</sup> |
|                                                     | CC              | 218             | 145          | 1         |               |                       |
| rs16996674                                          | TC              | 163             | 179          | 1.651026  | (1.22,2.23)   | 0.001                 |
|                                                     | TT              | 30              | 79           | 3.95908   | (2.47,6.33)   | 9.49x10 <sup>-9</sup> |
|                                                     | GG              | 188             | 136          | 1         |               |                       |
| rs16996677                                          | AG              | 178             | 180          | 1.397885  | (1.03,1.89)   | 0.03                  |
|                                                     | AA              | 39              | 97           | 3.43816   | (2.23,5.3)    | 2.14x10 <sup>-8</sup> |

## **Supplemental Note: Members of the Family Investigation of Nephropathy and Diabetes Research Group**

Genetic Analysis and Data Coordinating Center, Case Western Reserve University, Cleveland, Ohio: SK Iyengar\*, RC Elston\*\*, KAB Goddard\*\*, JM Olson\*\*, S Ialacci#, J Fondran, A Horvath, R Igo, Jr., G Jun, K Kramp, J. Molineros, SRE Quade,

### **PICs:**

Case Western Reserve University, Cleveland, OH: JR Sedor\*, J Schelling\*\*, A Pickens#, L Humbert, L Getz-Fradley.

Harbor-University of California Los Angeles Medical Center: S Adler\*, E Ipp\*\*, M Pahl\*\*†, MF Seldin\*\* §, S Snyder\*\*, J Tayek\*\*, E Hernandez#, J LaPage#, C Garcia, J Gonzalez, M Aguilar.

Johns Hopkins University, Baltimore, MD: M.J. Klag\*, R.S. Parekh\*, W.H. L Kao\*\*, L.A Meoni\*\*, T Whitehead, J Chester#.

National Institute of Diabetes and Digestive and Kidney Diseases, Phoenix, AZ: WC Knowler\*, RL Hanson\*\*, RG Nelson\*\*, J Wolford\*\*, L Jones#, R Juan, R Lovelace, C Luethe, LM Phillips, J Sewemaenewa, I Sili, B Waseta.

University of California, Los Angeles, CA: MF Saad\*, SB Nicholas\*, Y-D I Chen\*\*, X Guo\*\*, J Rotter\*\*, K Taylor\*\*, M Budgett, F Hariri#.

University of New Mexico, Albuquerque, NM: P Zager\*, V Shah\*\*, M Scavini\*\*, A Bobelu#.

University of Texas Health Science Center at San Antonio, San Antonio, TX: H Abboud\*, N Arar\*\*, R Duggirala\*\*, BS Kasinath\*\*, F Thameem\*\*, M Stern\*\*.

Wake-Forest University, Winston-Salem, NC: BI Freedman\* ‡, DW Bowden\*\*, CD Langefeld\*\*, SC Satko\*\*, SS Rich\*\*, S Warren#, S Viverette, G Brooks, R Young, M Spainhour.

Laboratory of Genomic Diversity, National Cancer Institute, Frederick MD: C Winkler\*, MW Smith\*\*, M Thompson, R Hanson#, B Kessing.

### **Minority Recruitment Centers:**

Loyola University Chicago – DJ Leehey\*, G Barone#

University of Alabama Birmingham – D Thornley-Brown\*, C Jefferson#

University of Chicago – OF Kohn\*, CS Brown#

National Institute of Diabetes and Digestive and Kidney Diseases program office: JP Briggs, PL Kimmel, R Rasooly

External Advisory Committee: D Warnock (chair), L Cardon, R Chakraborty, GM Dunston, T Hostetter, SJ O'Brien (ad hoc), J Rioux, R Spielman.

\* Principal Investigator

\*\* Co-investigator

# Program Coordinator

§ University of California, Davis, CA

† University of California, Irvine, CA

‡ Study Chair
